# Supplementary material for: Investigation of the Protection of the C4 Hydroxyl Group in Macrobicyclic Kdo Donors
Source: MDPI journal article supplement (doi:10.3390/molecules28010102), 2022-12-23

**This PDF file includes:**

**Copies of  $^1\text{H}$  and  $^{13}\text{C}$  NMR spectra**

$^1\text{H}$  NMR,  $\text{CDCl}_3$ , 500 MHz

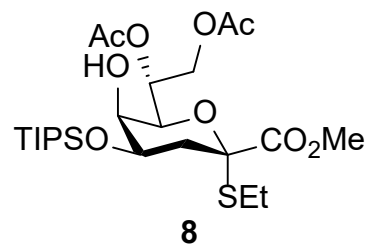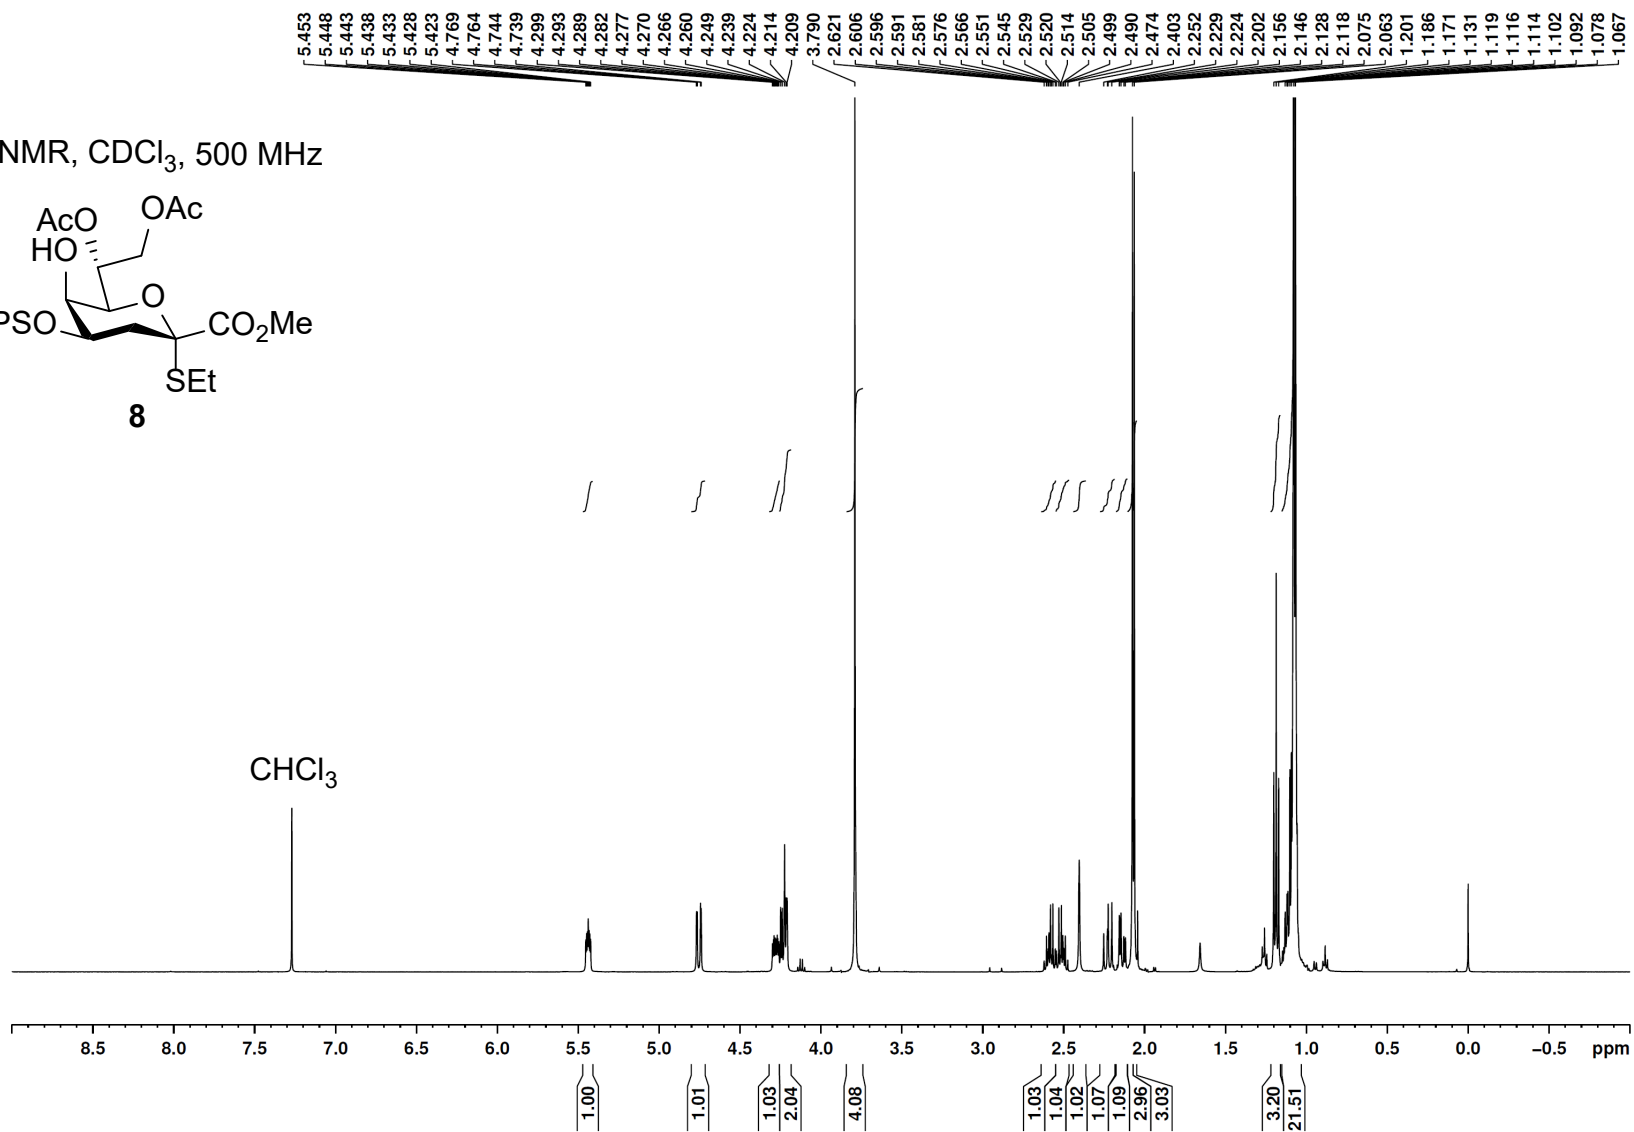

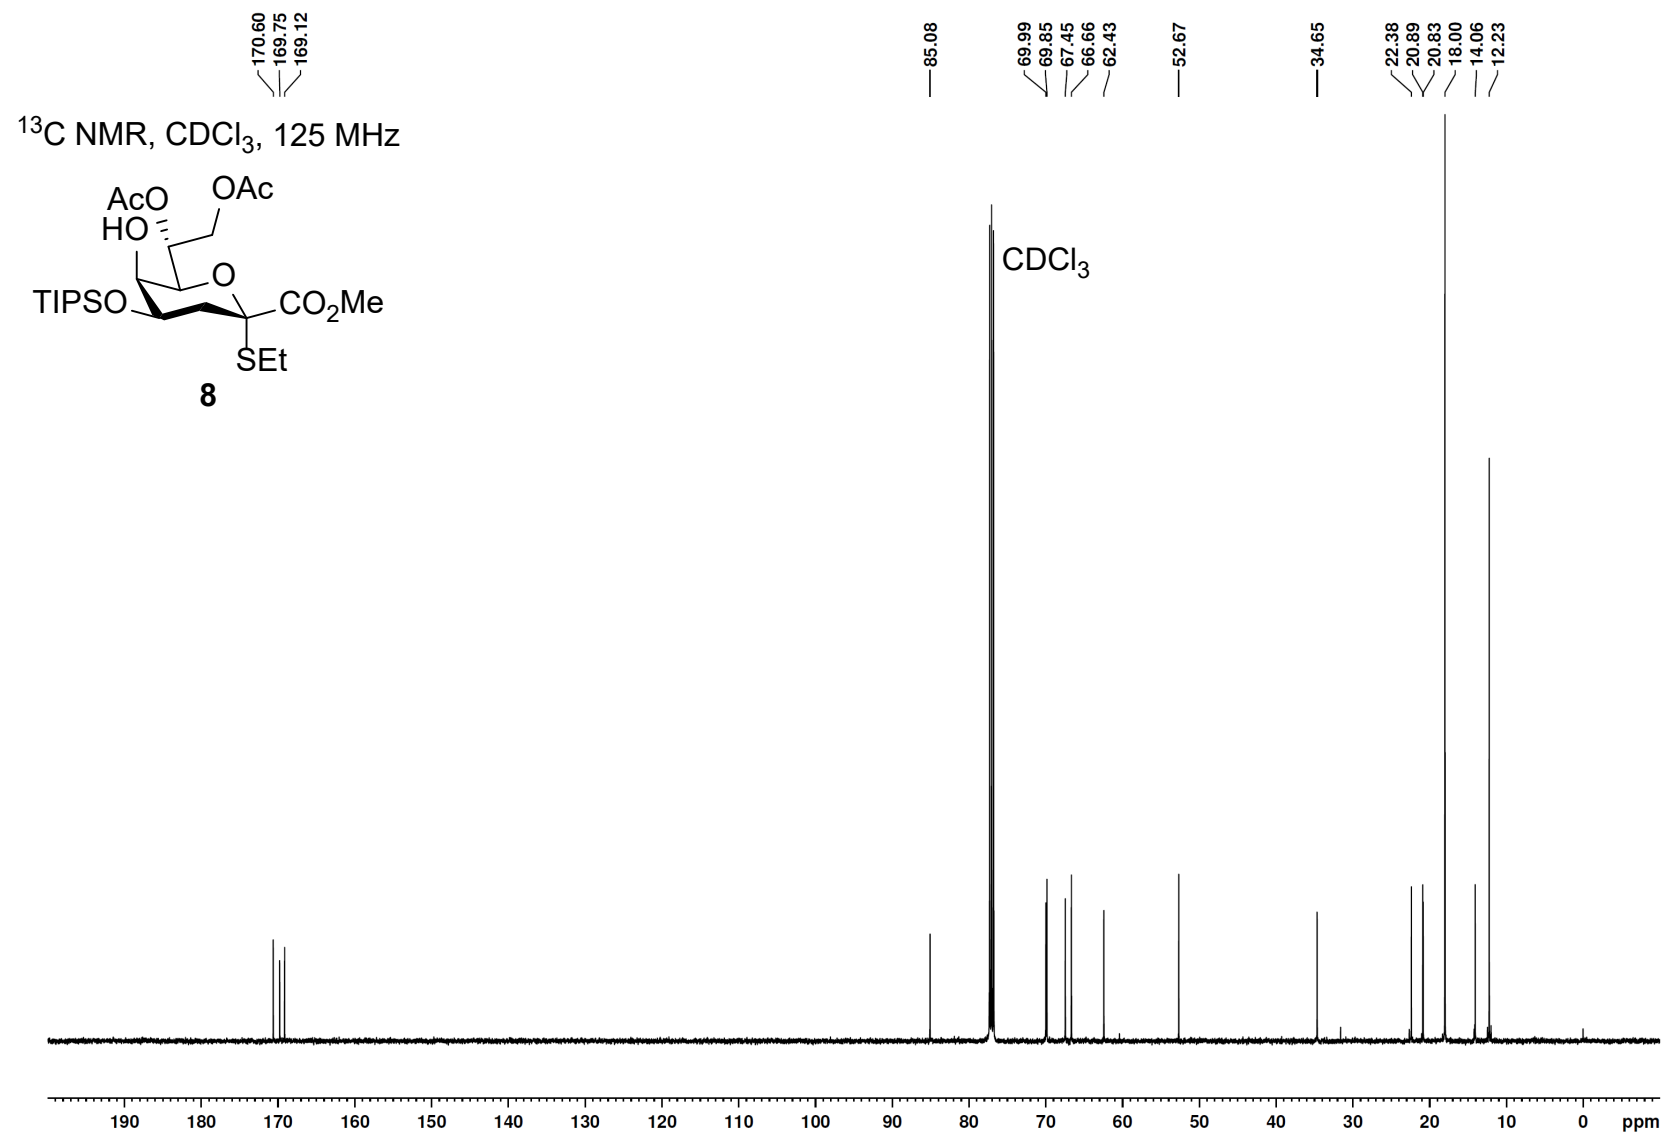

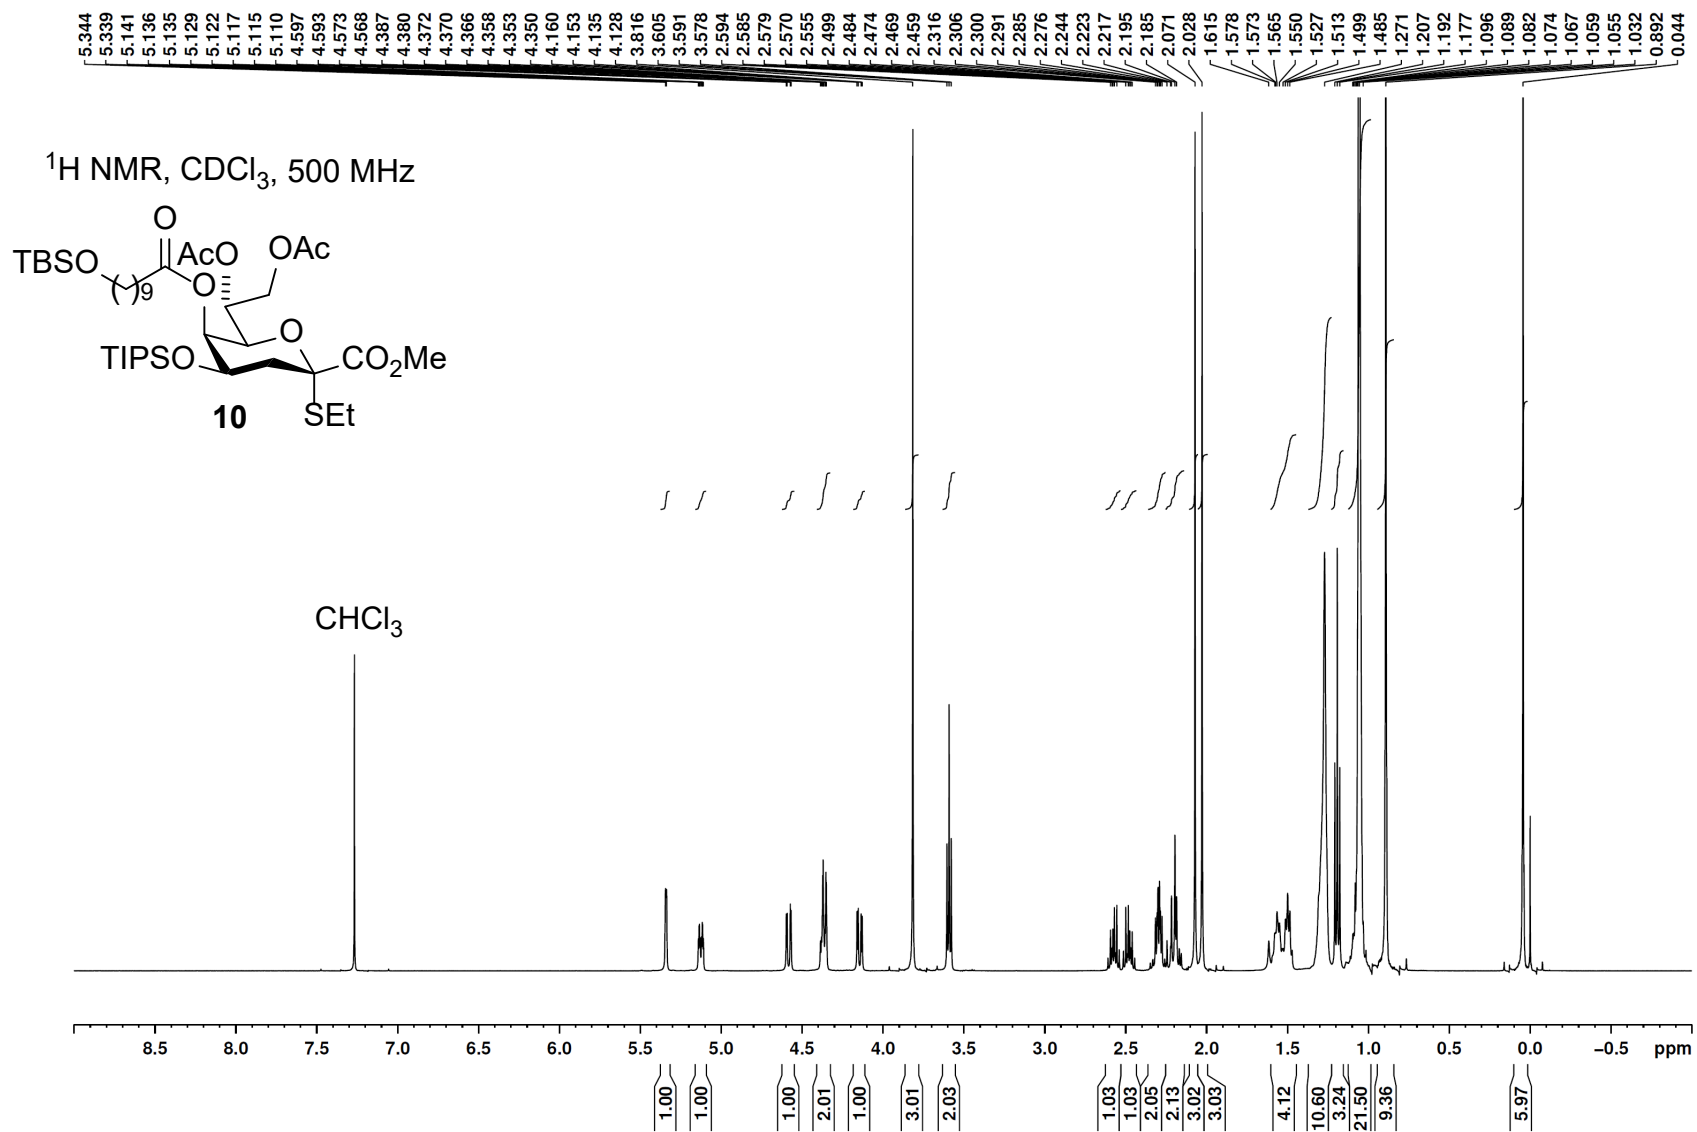



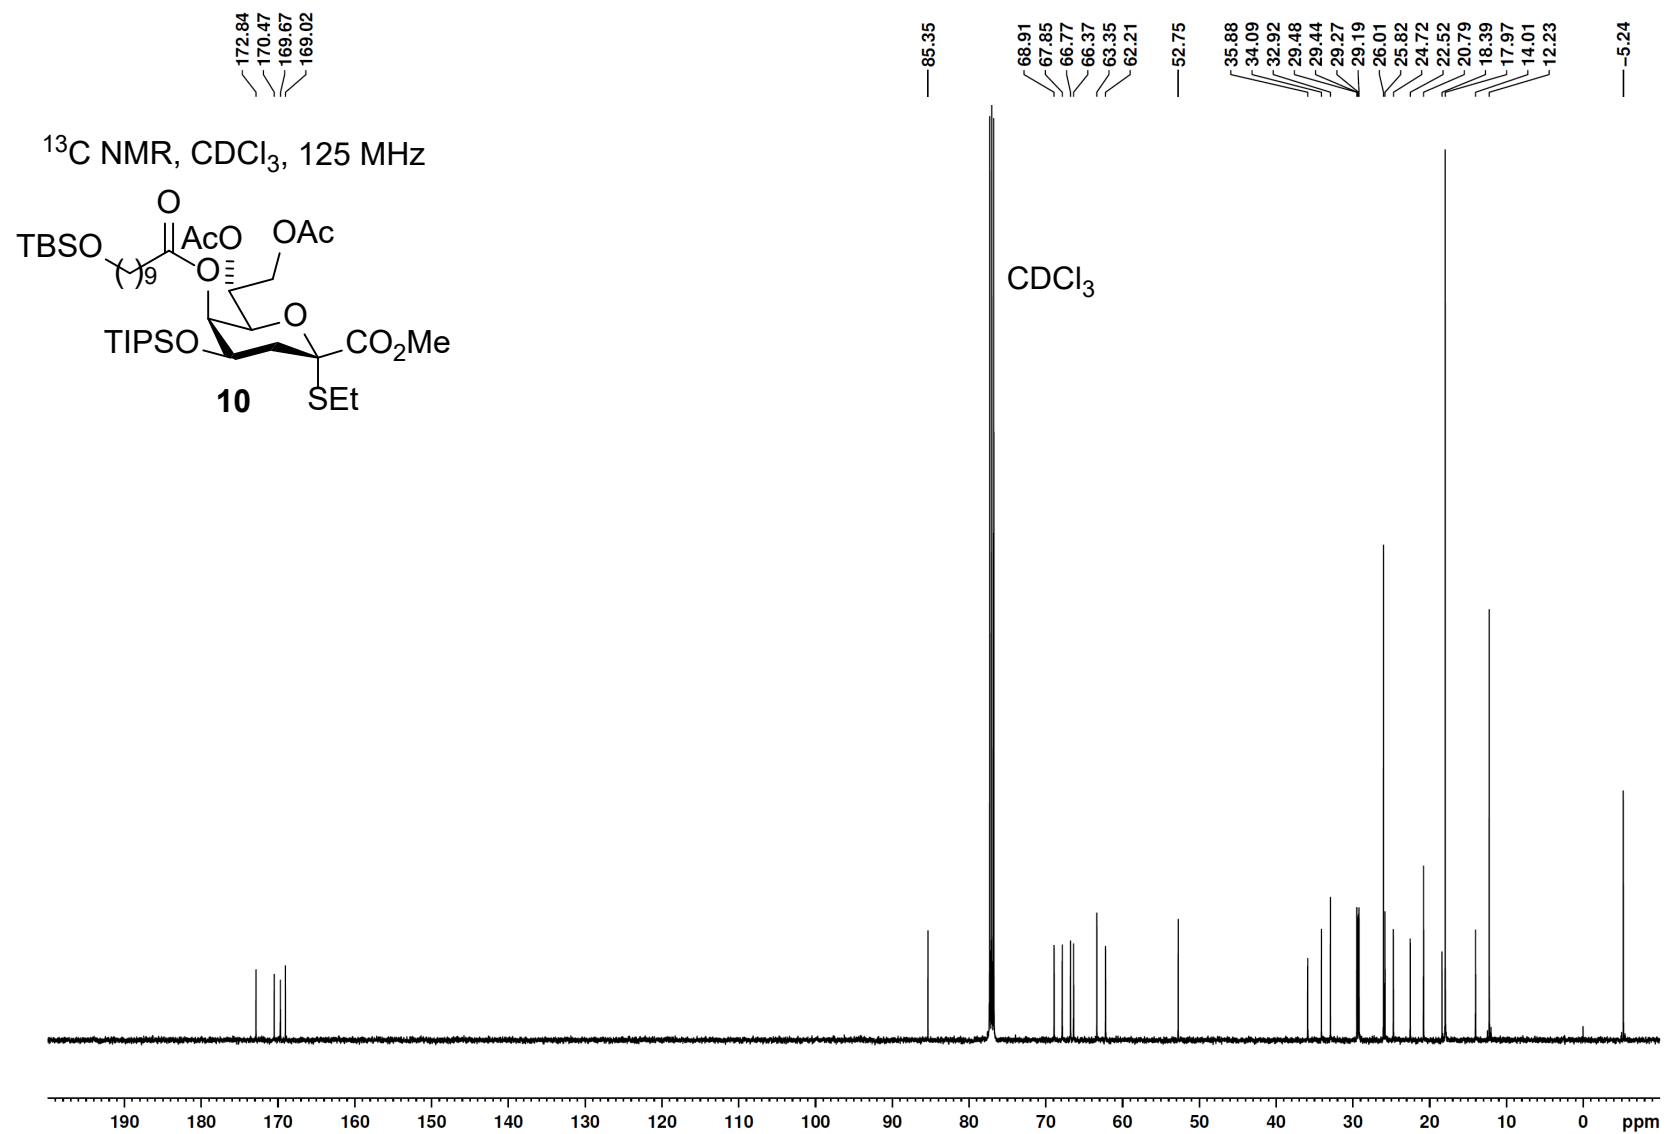

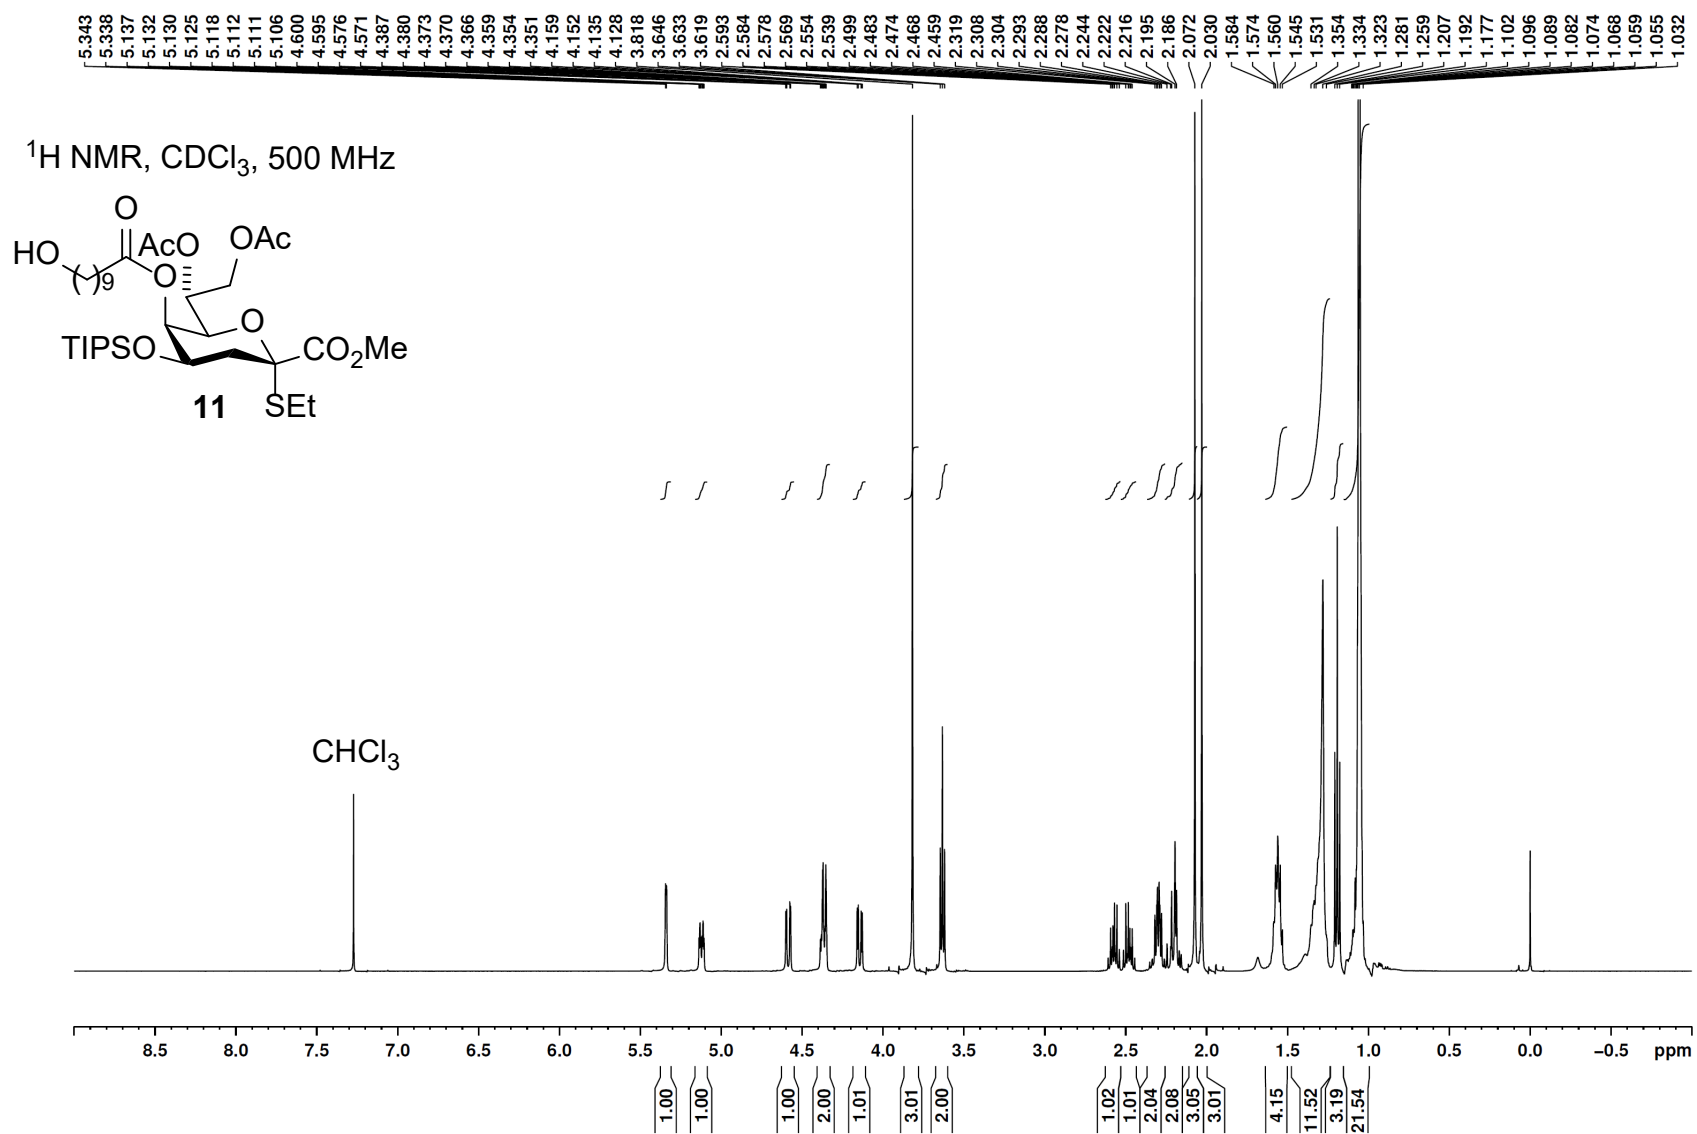

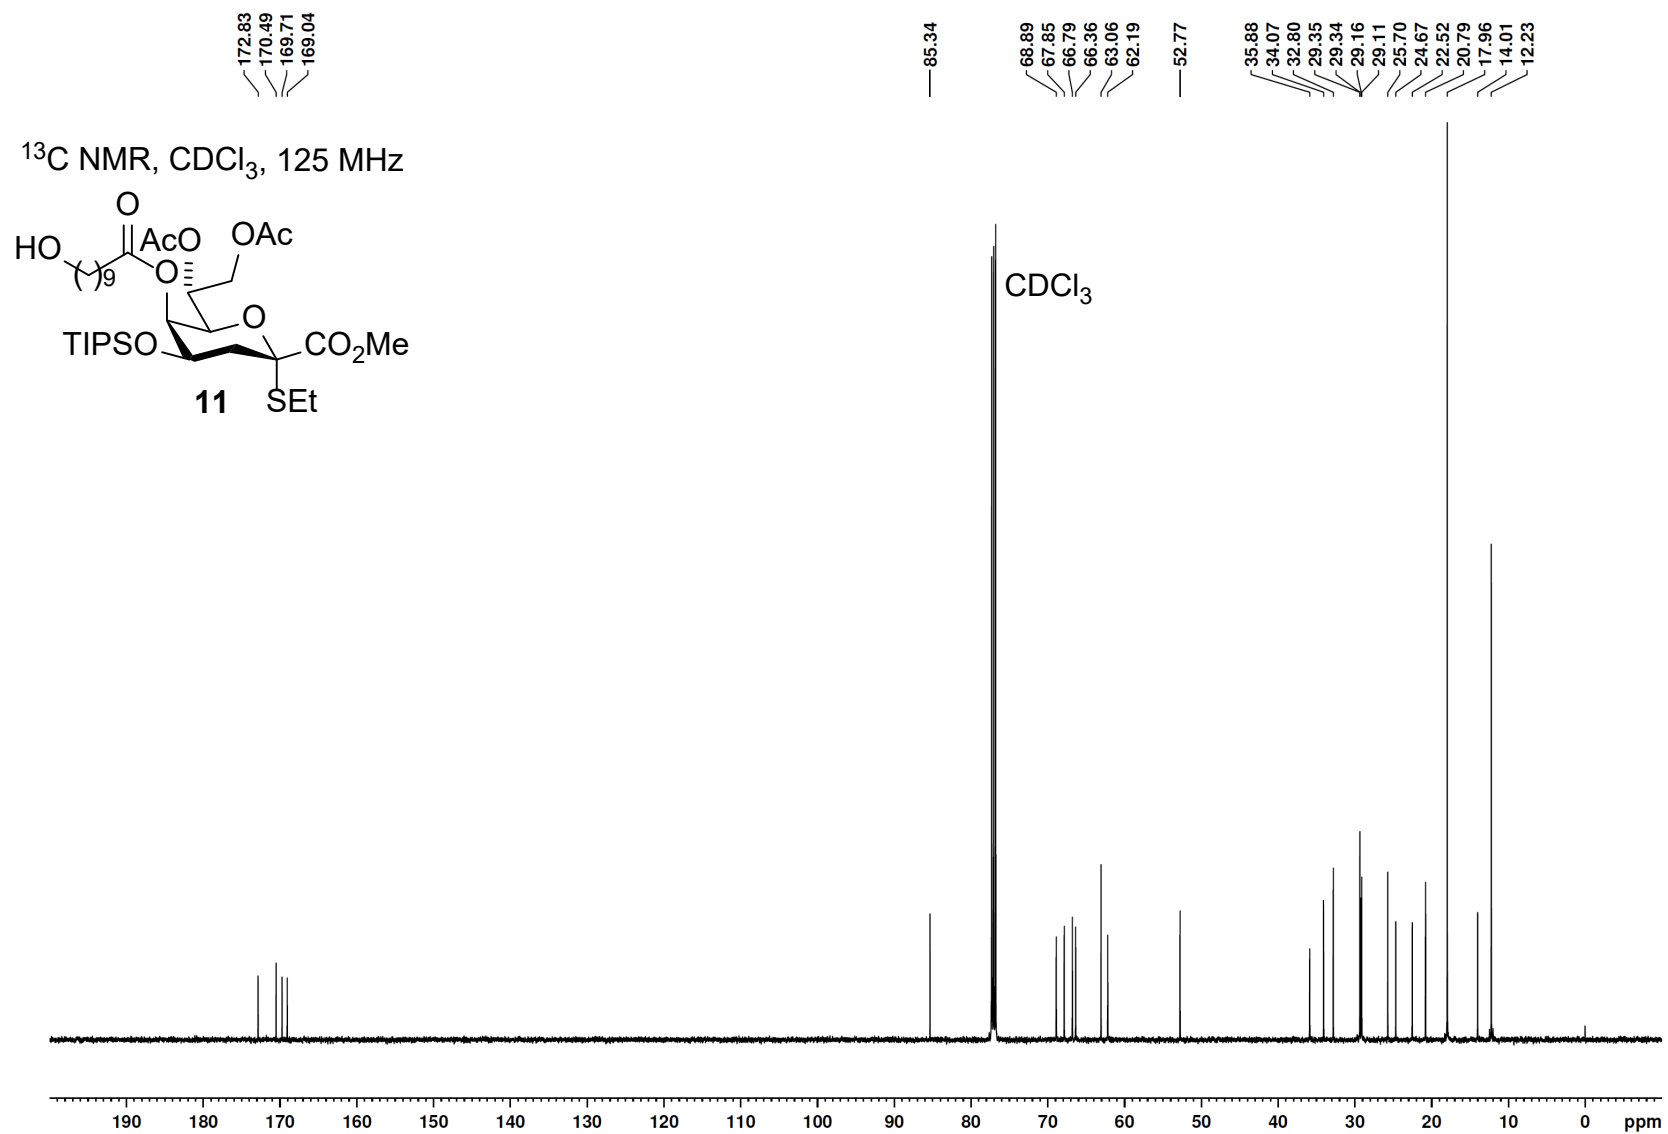

$^1\text{H}$  NMR,  $\text{CD}_3\text{OD}$ , 500 MHz

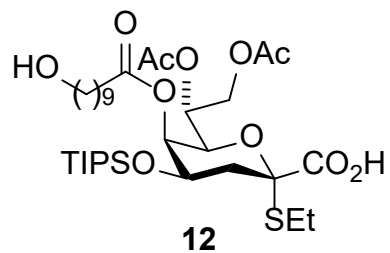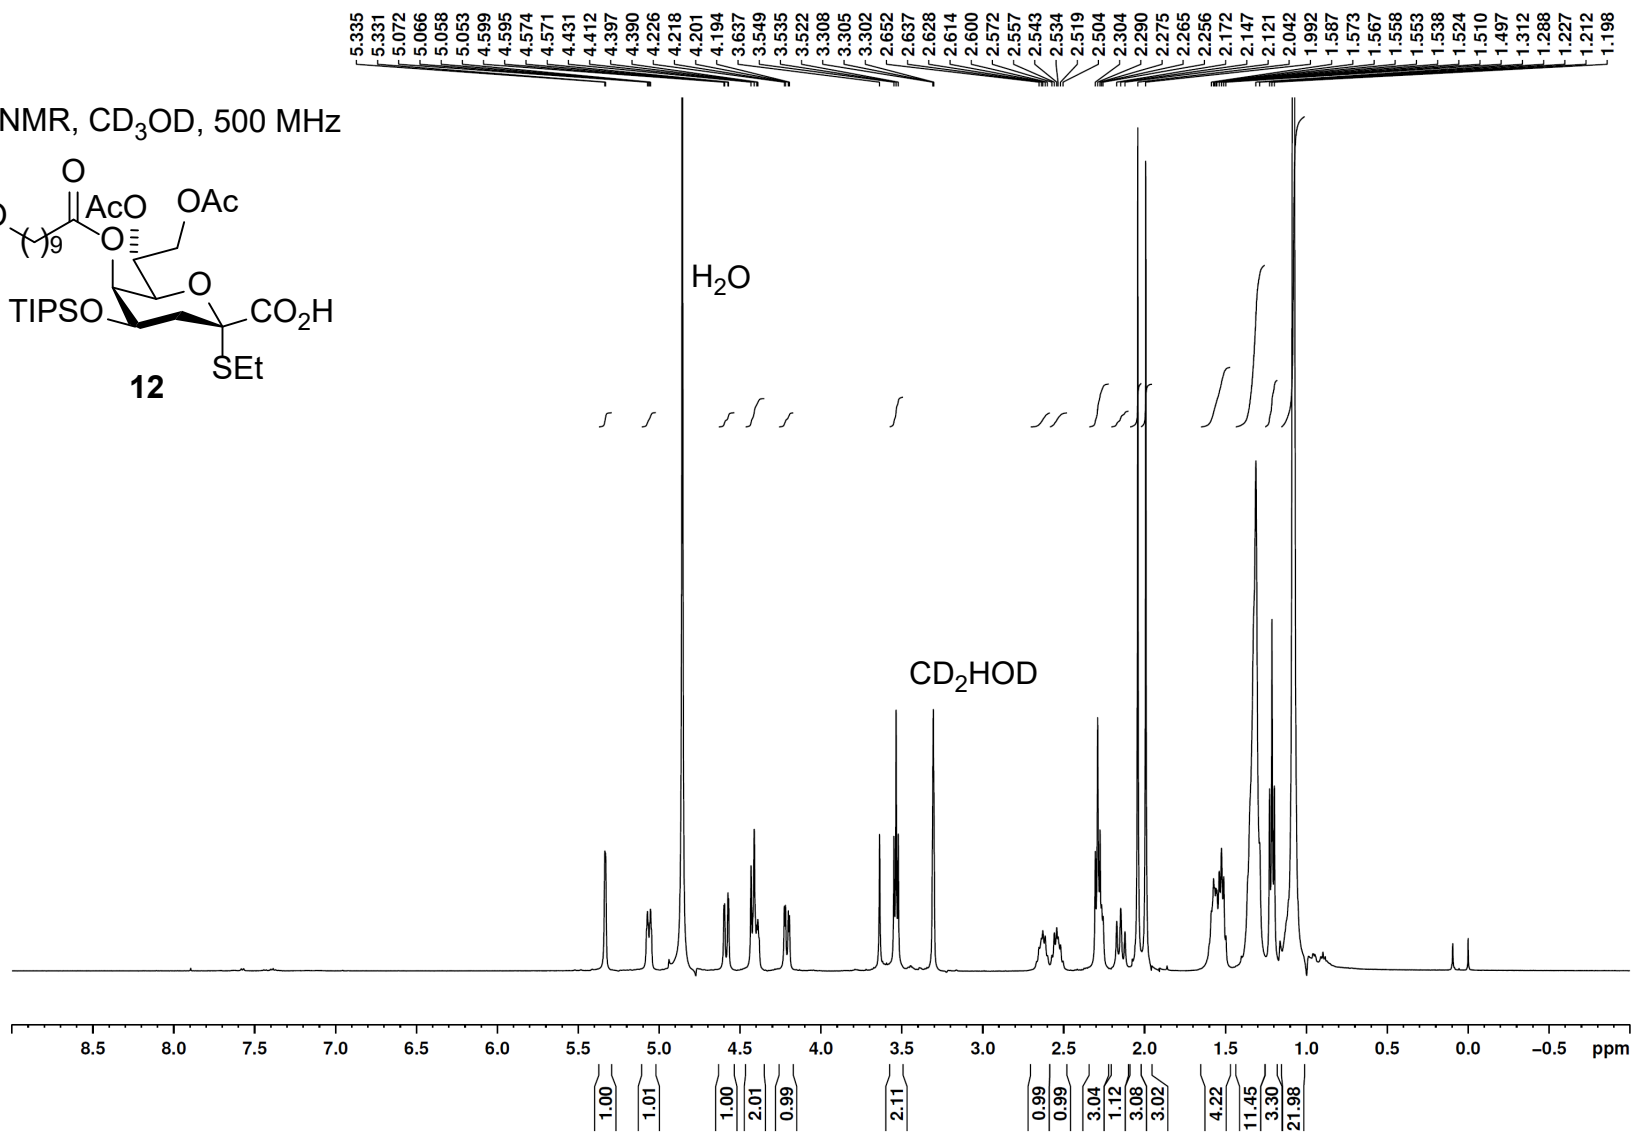

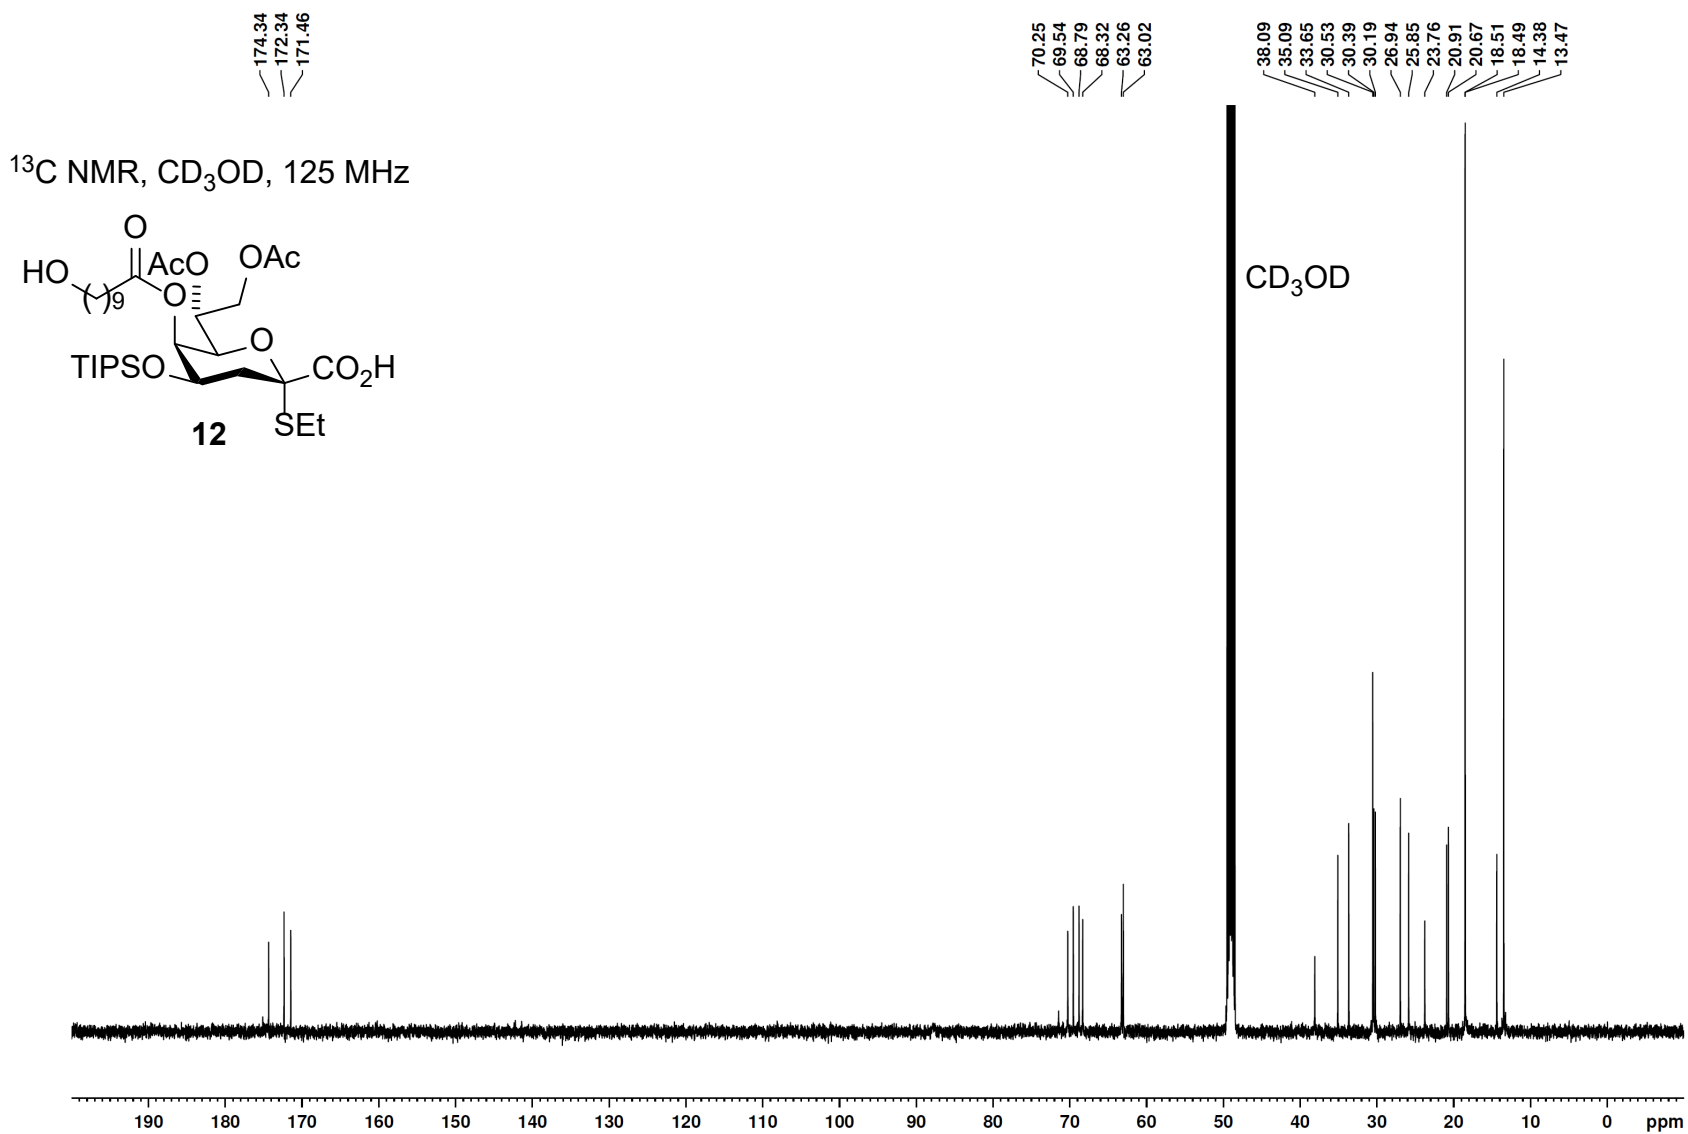

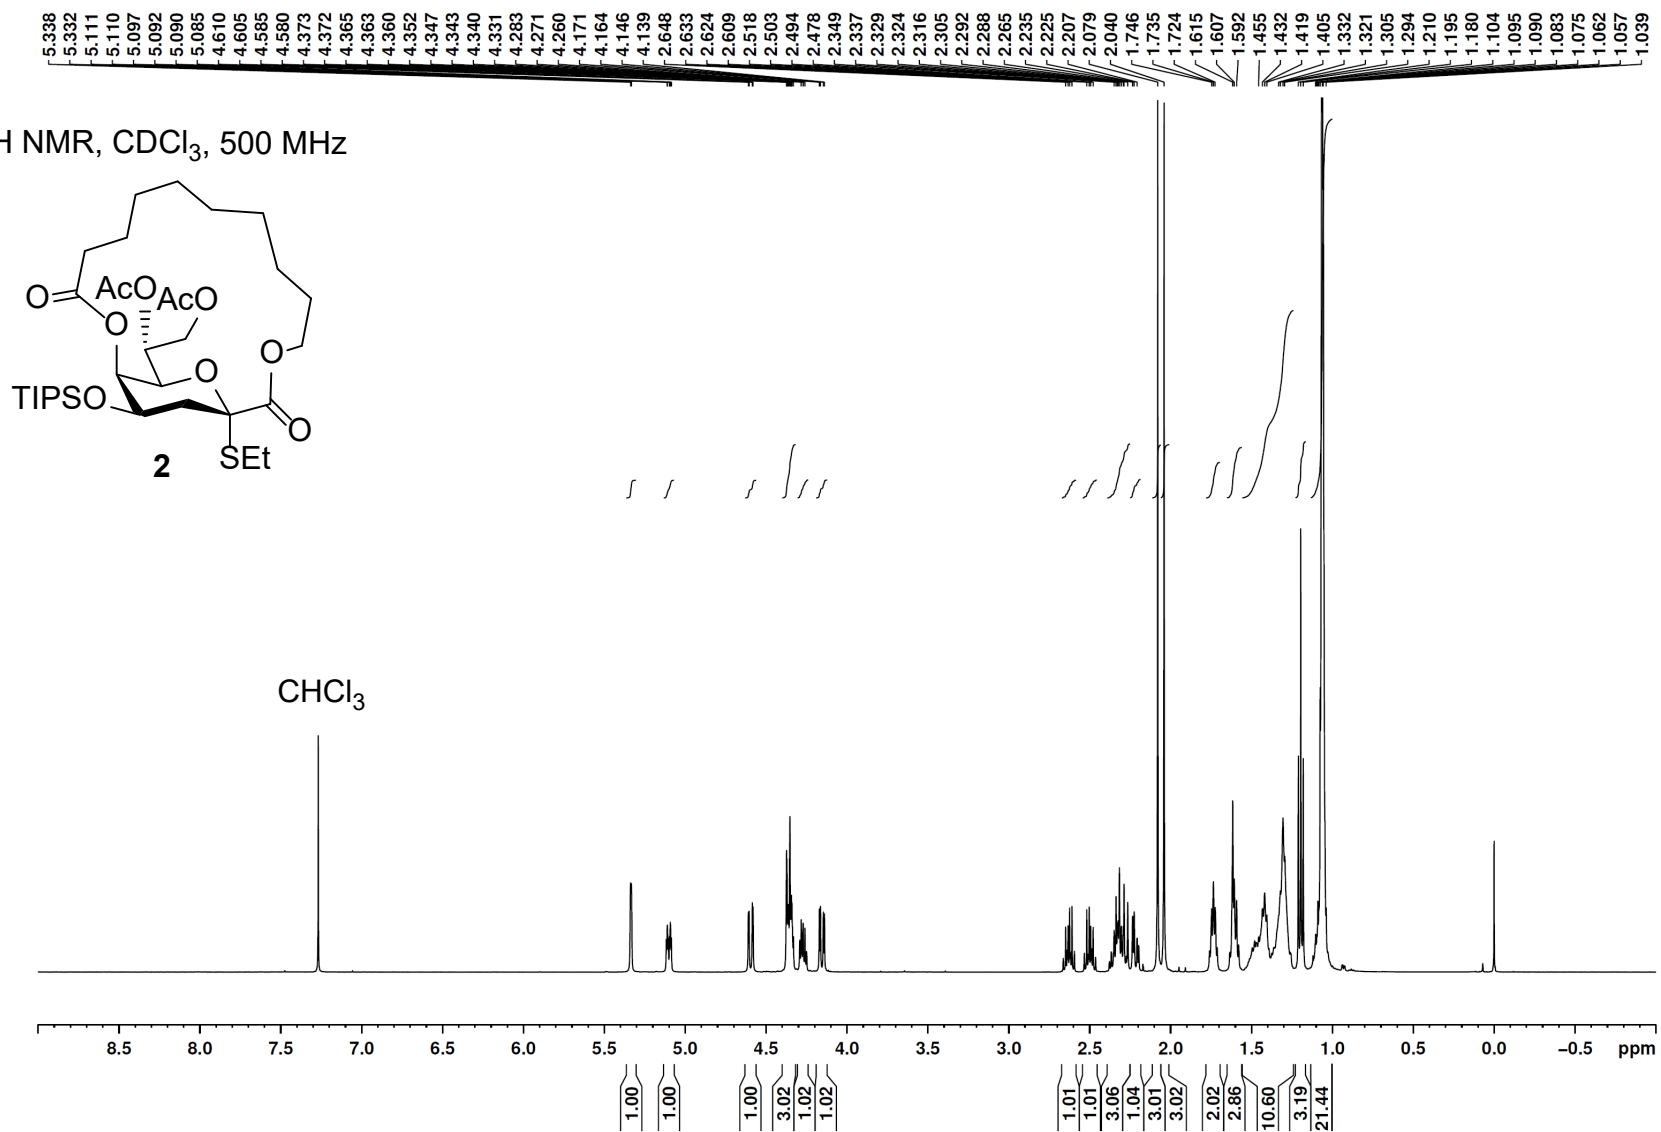

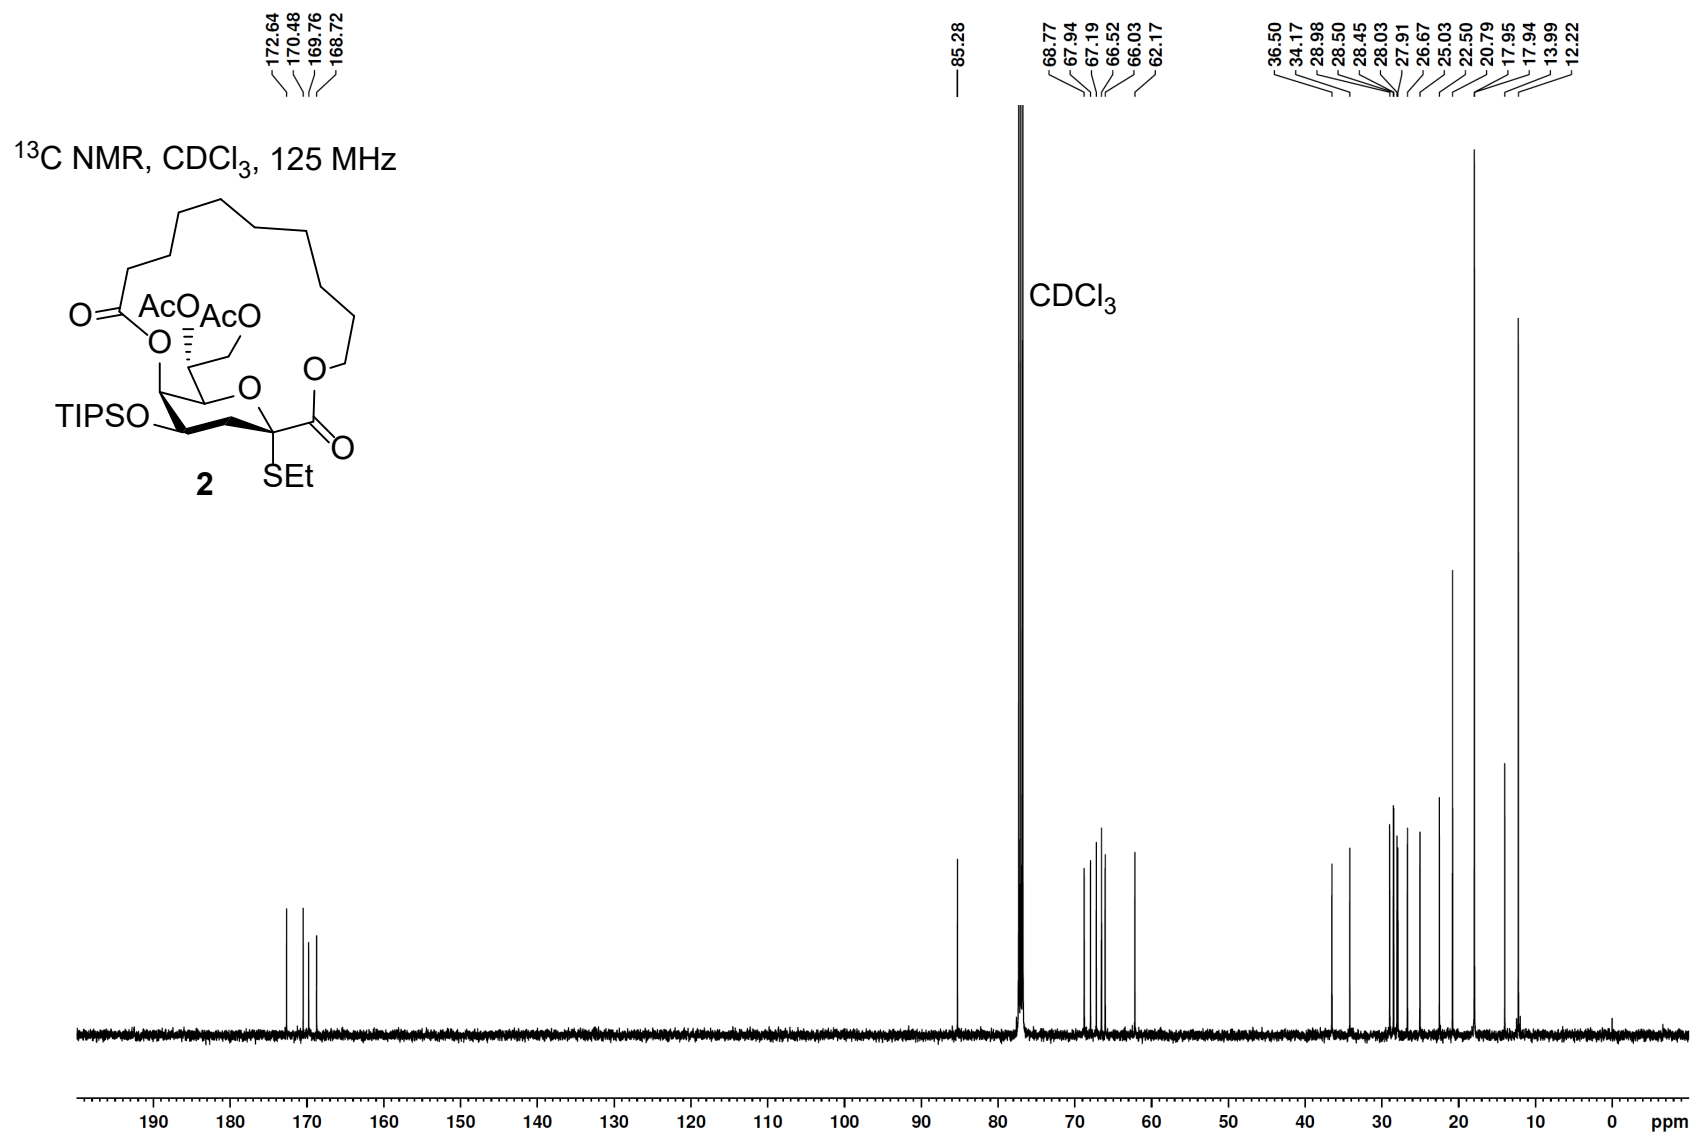

$^1\text{H}$  NMR,  $\text{CDCl}_3$ , 500 MHz

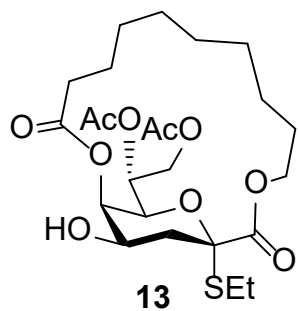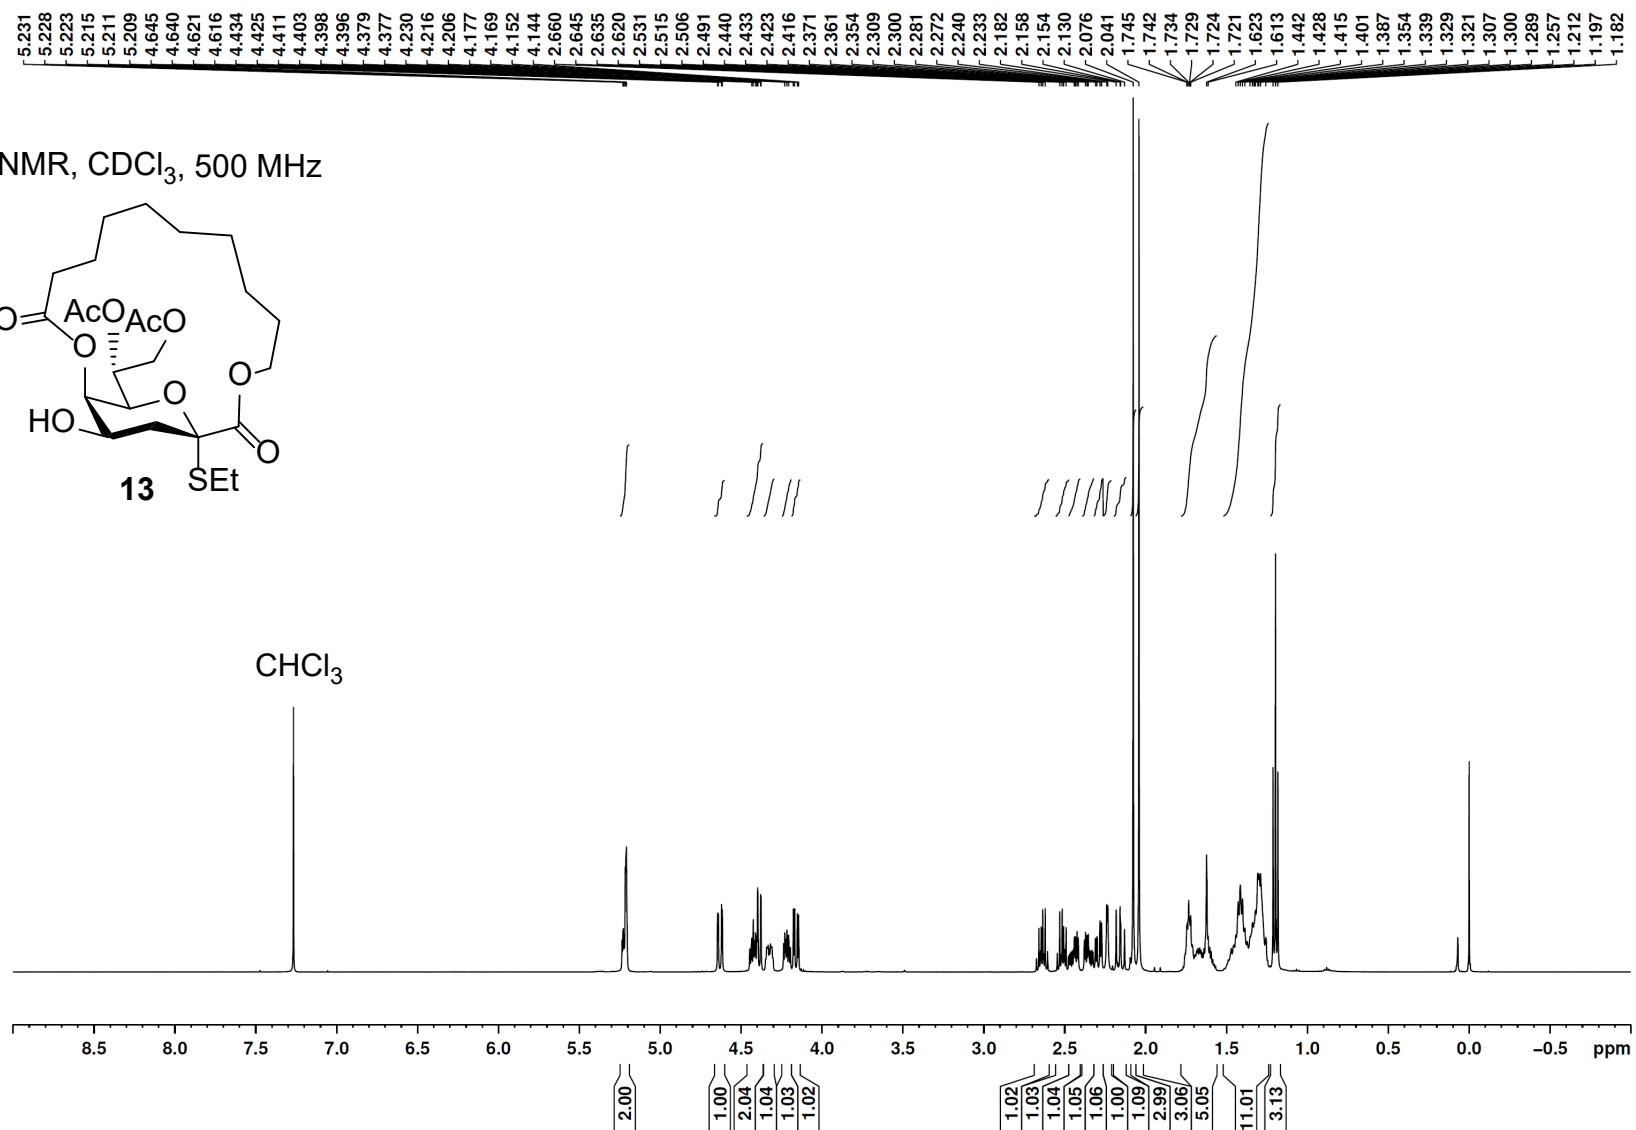



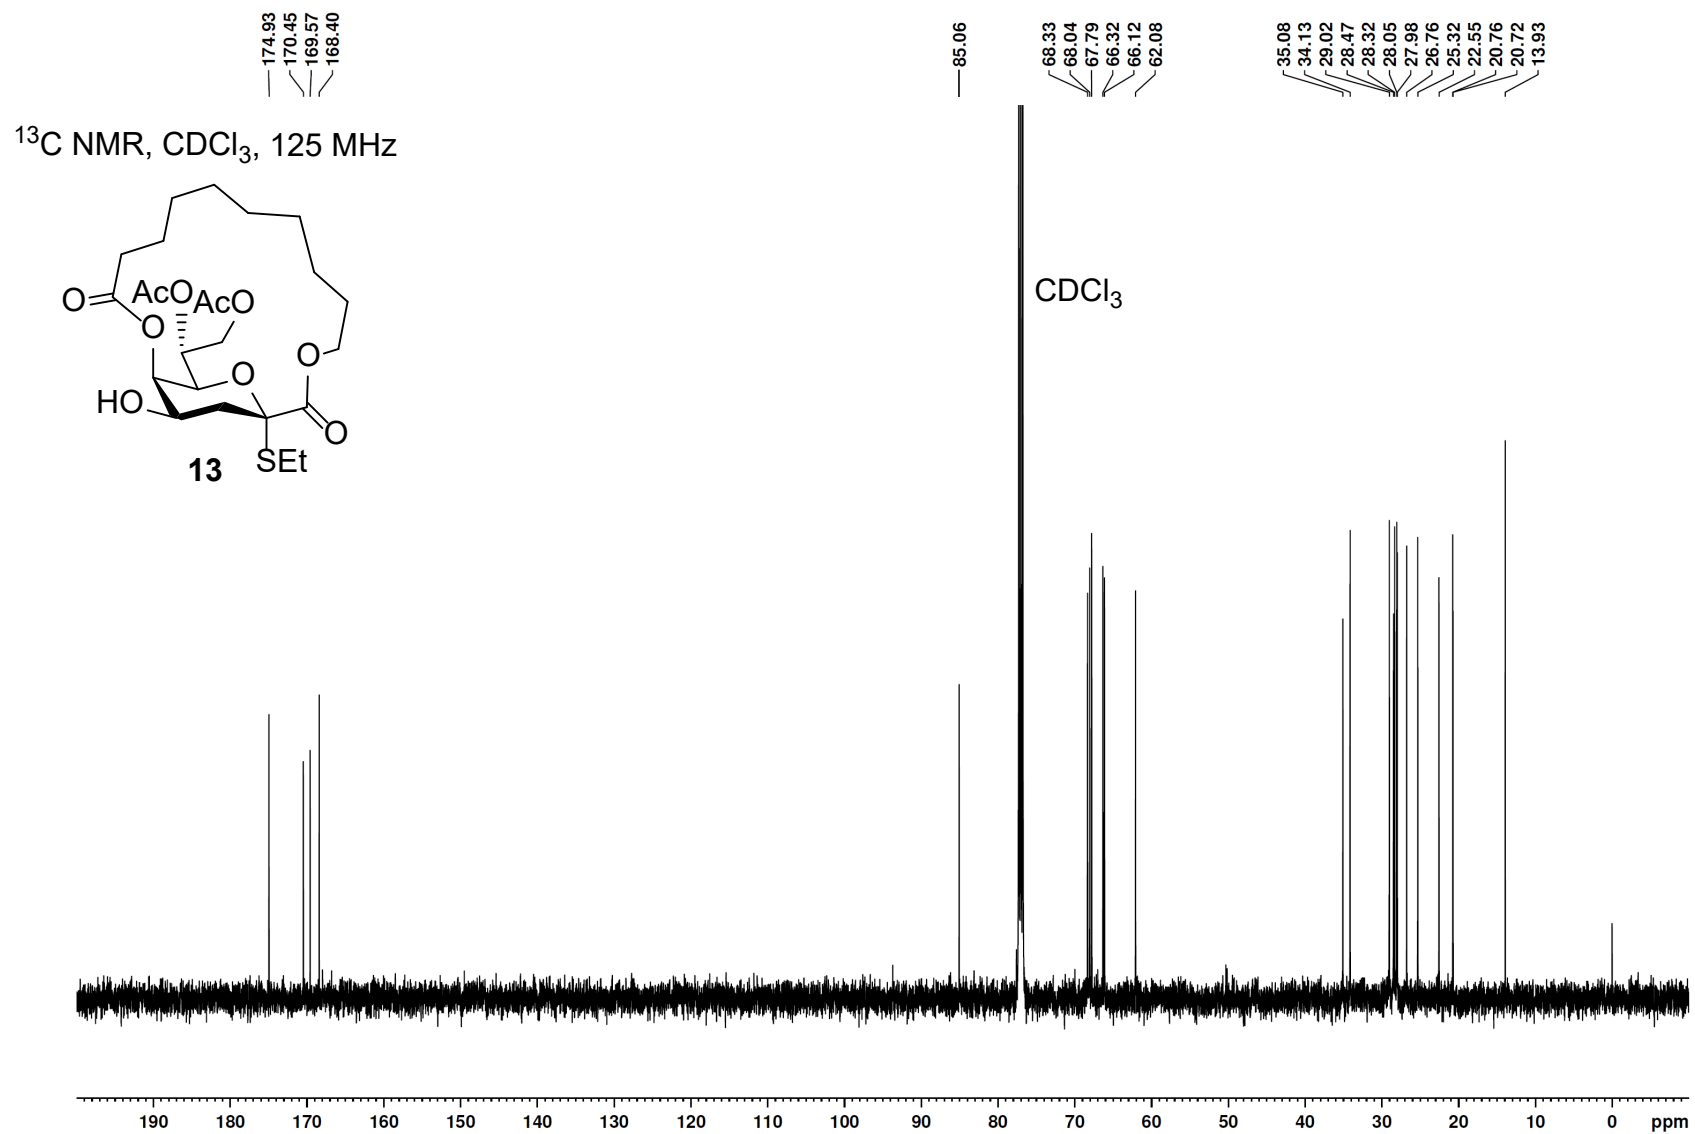

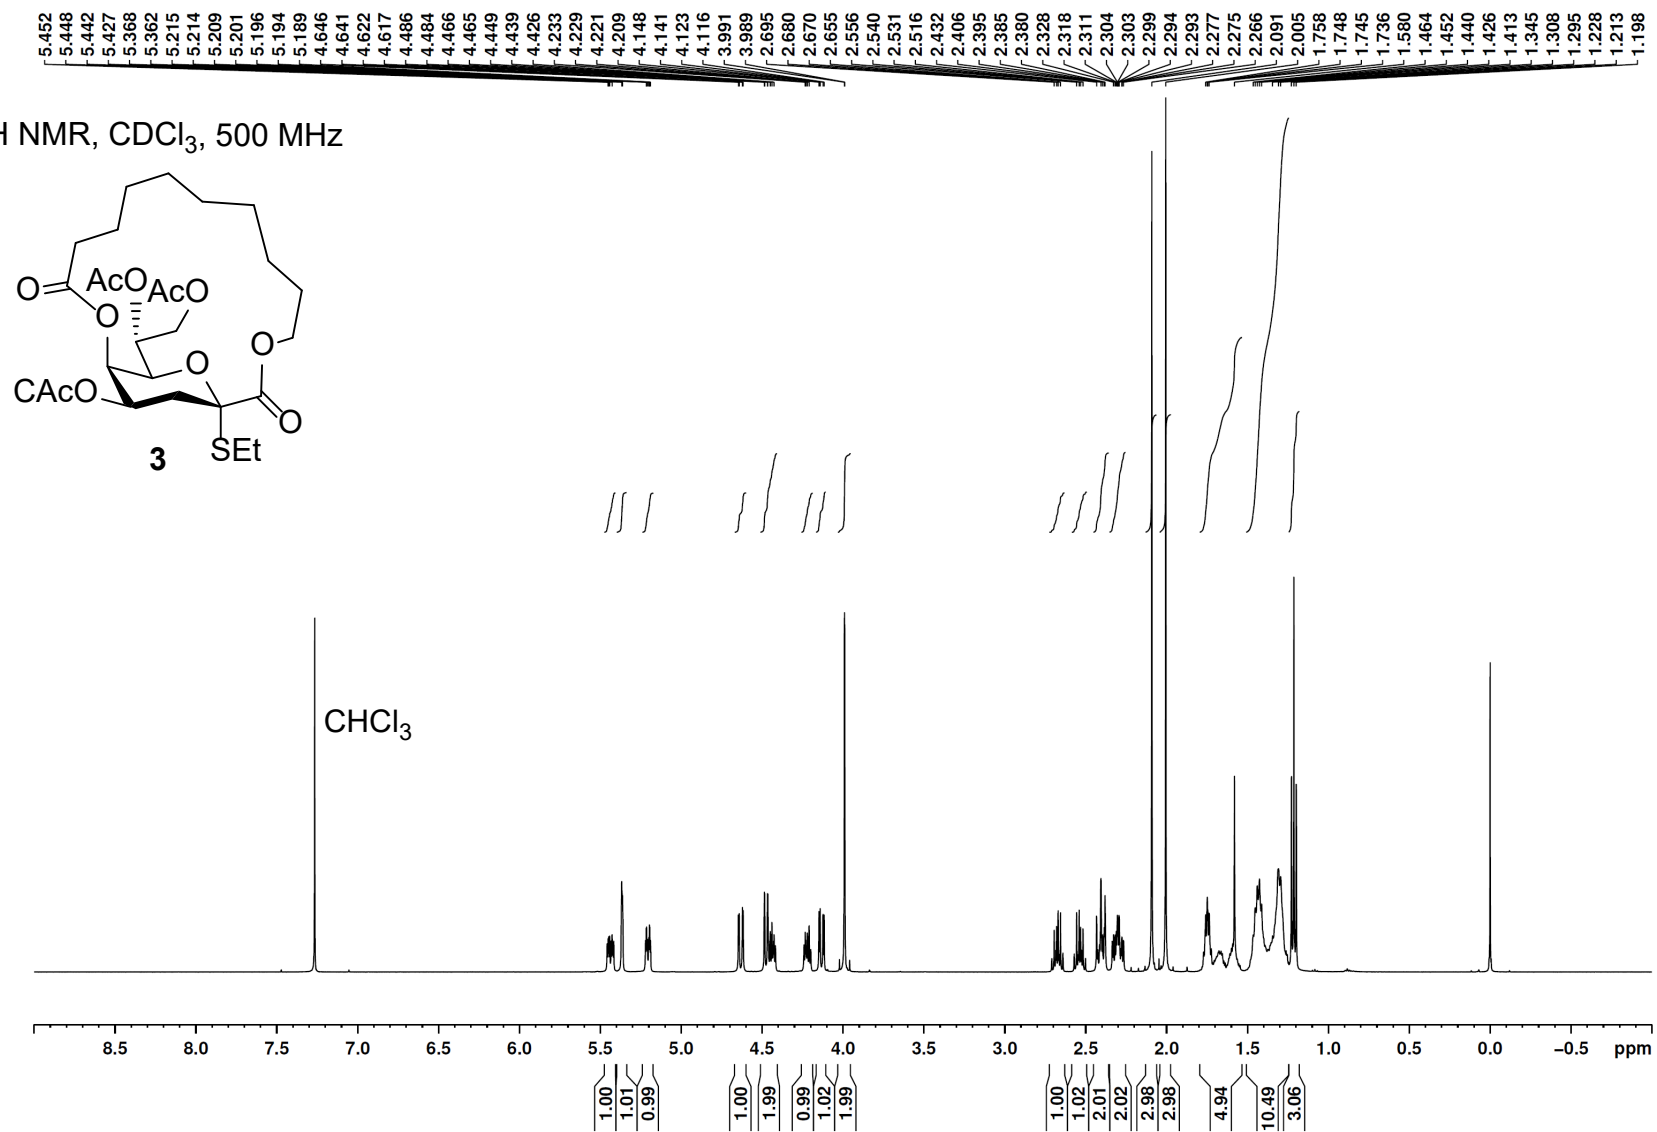

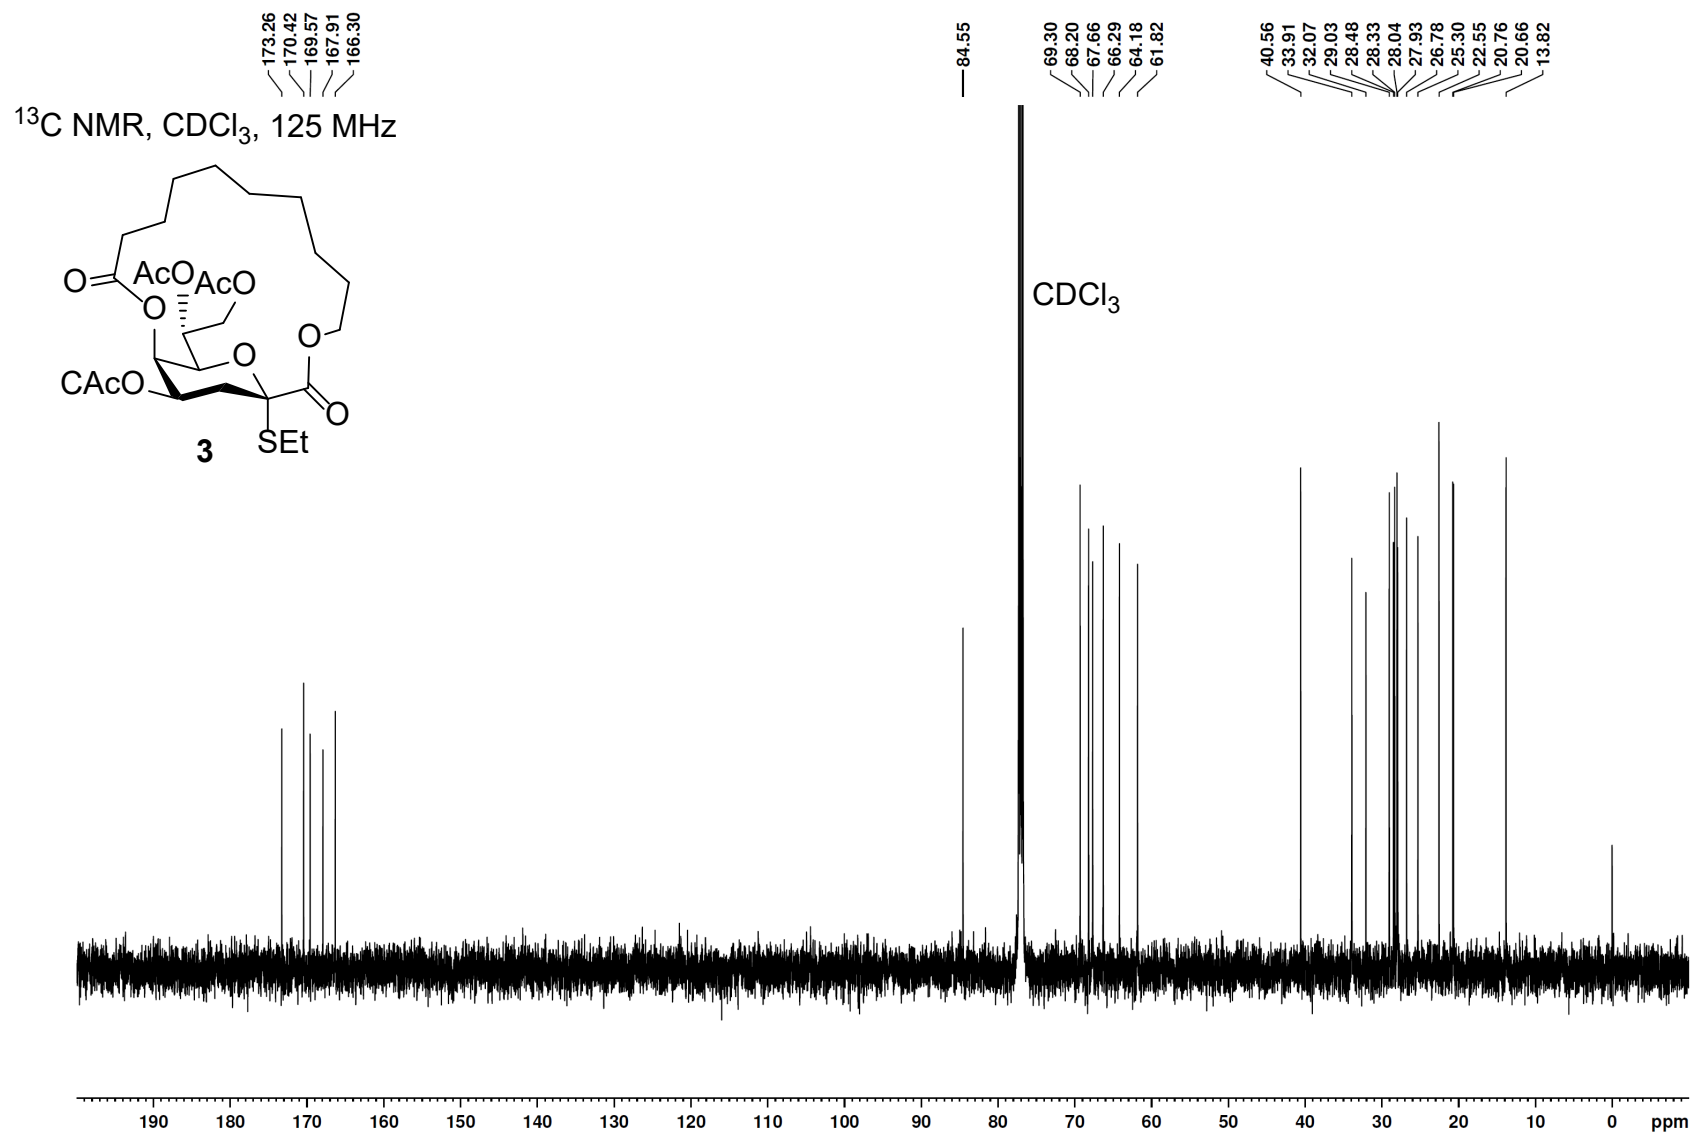

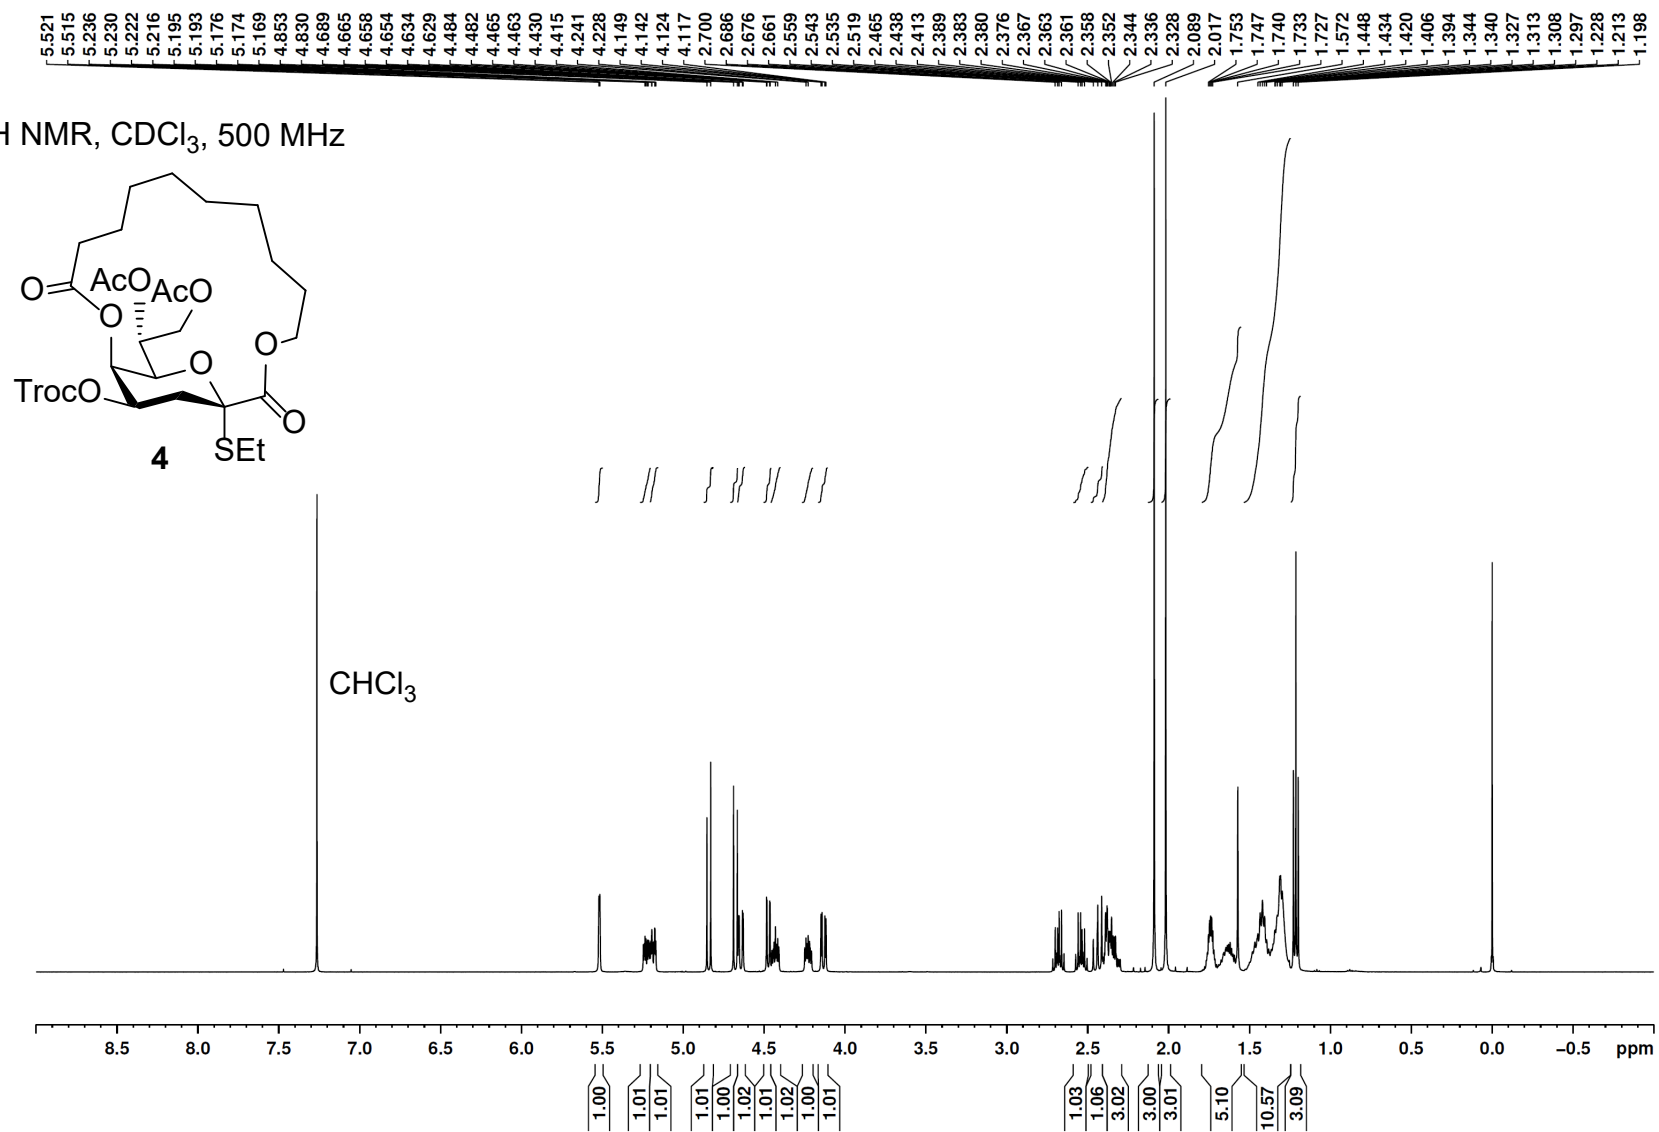

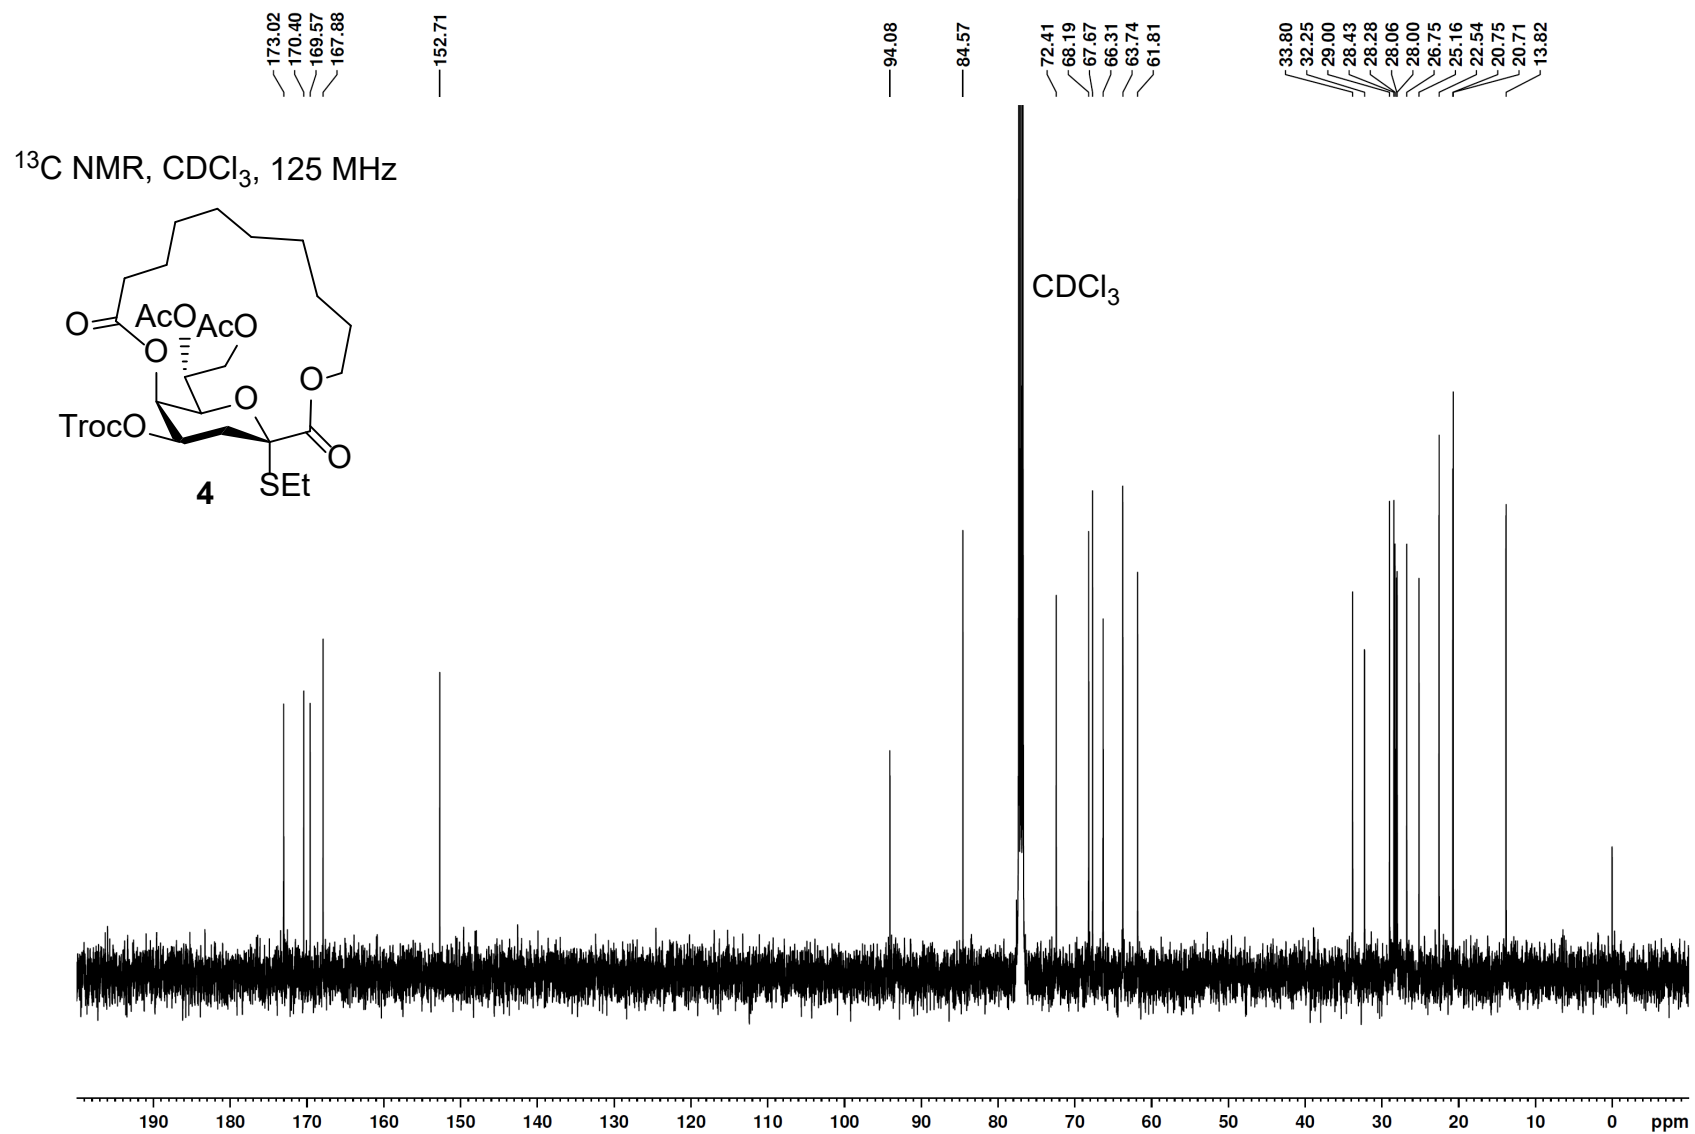

$^1\text{H}$  NMR,  $\text{CDCl}_3$ , 500 MHz

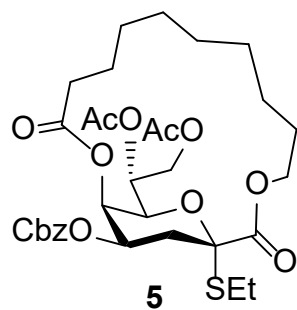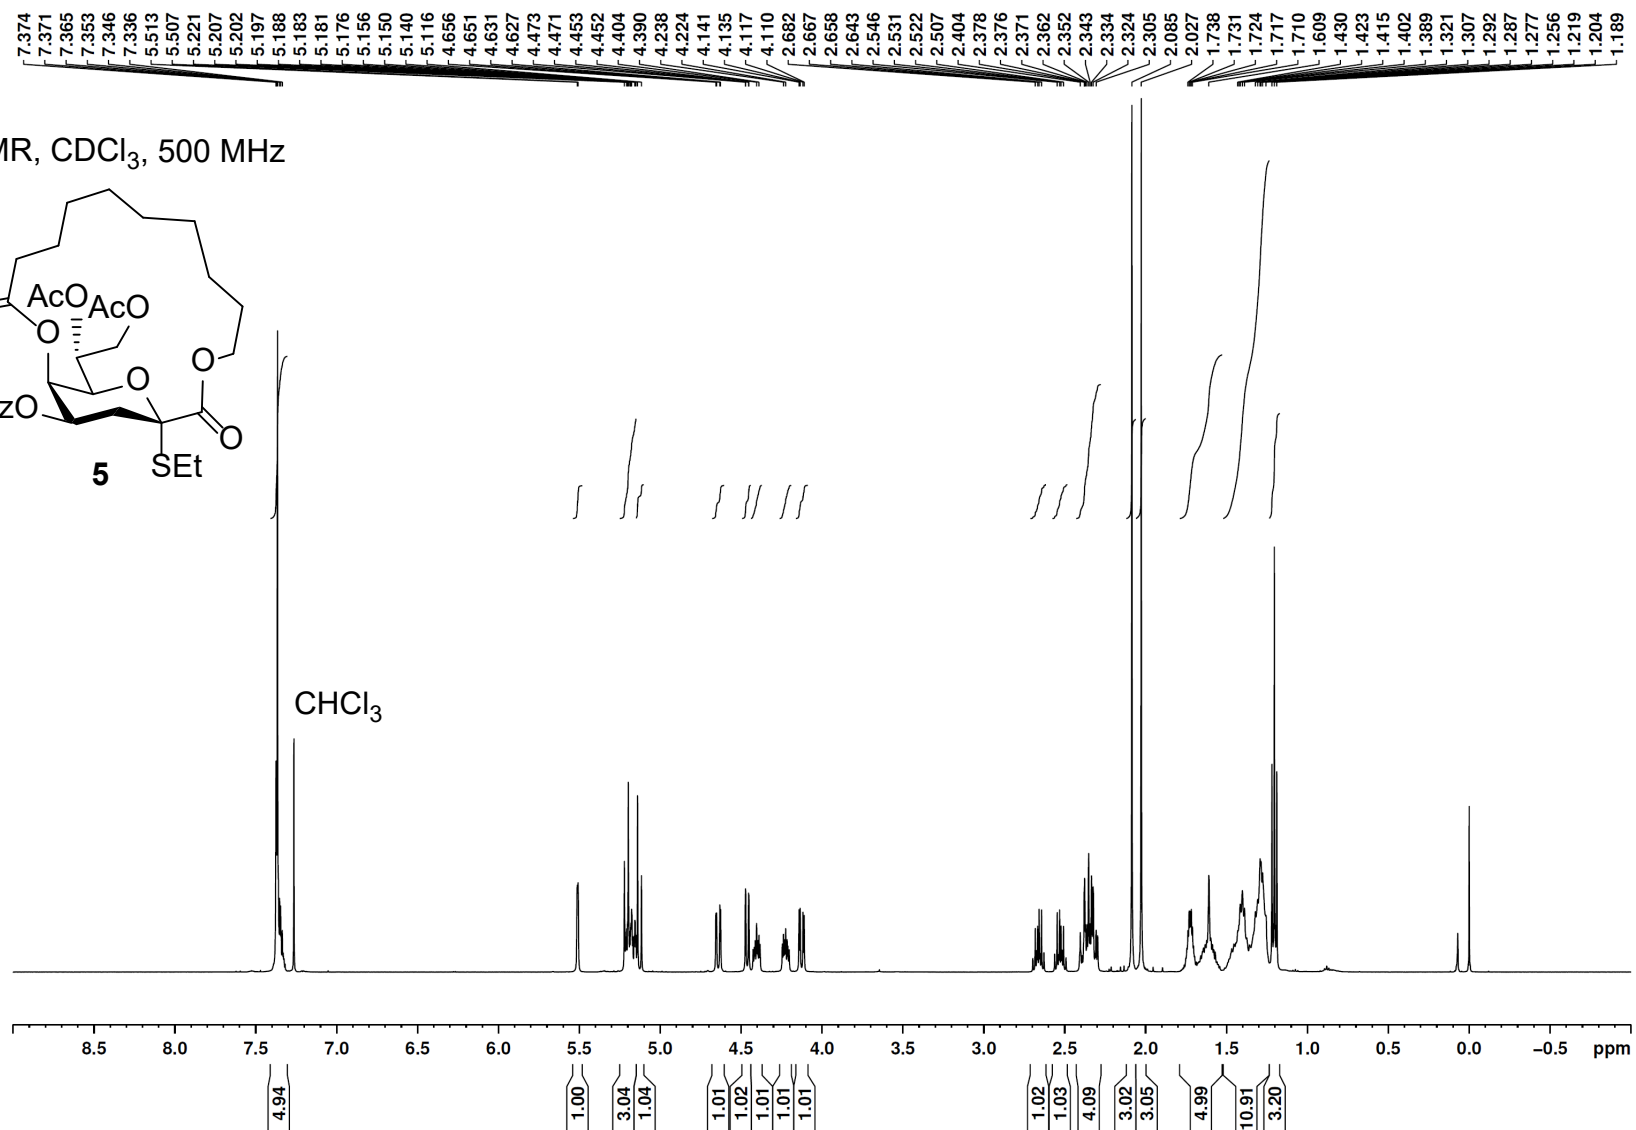

$^{13}\text{C}$  NMR,  $\text{CDCl}_3$ , 125 MHz

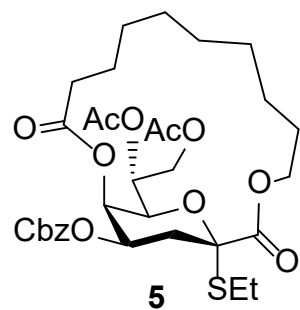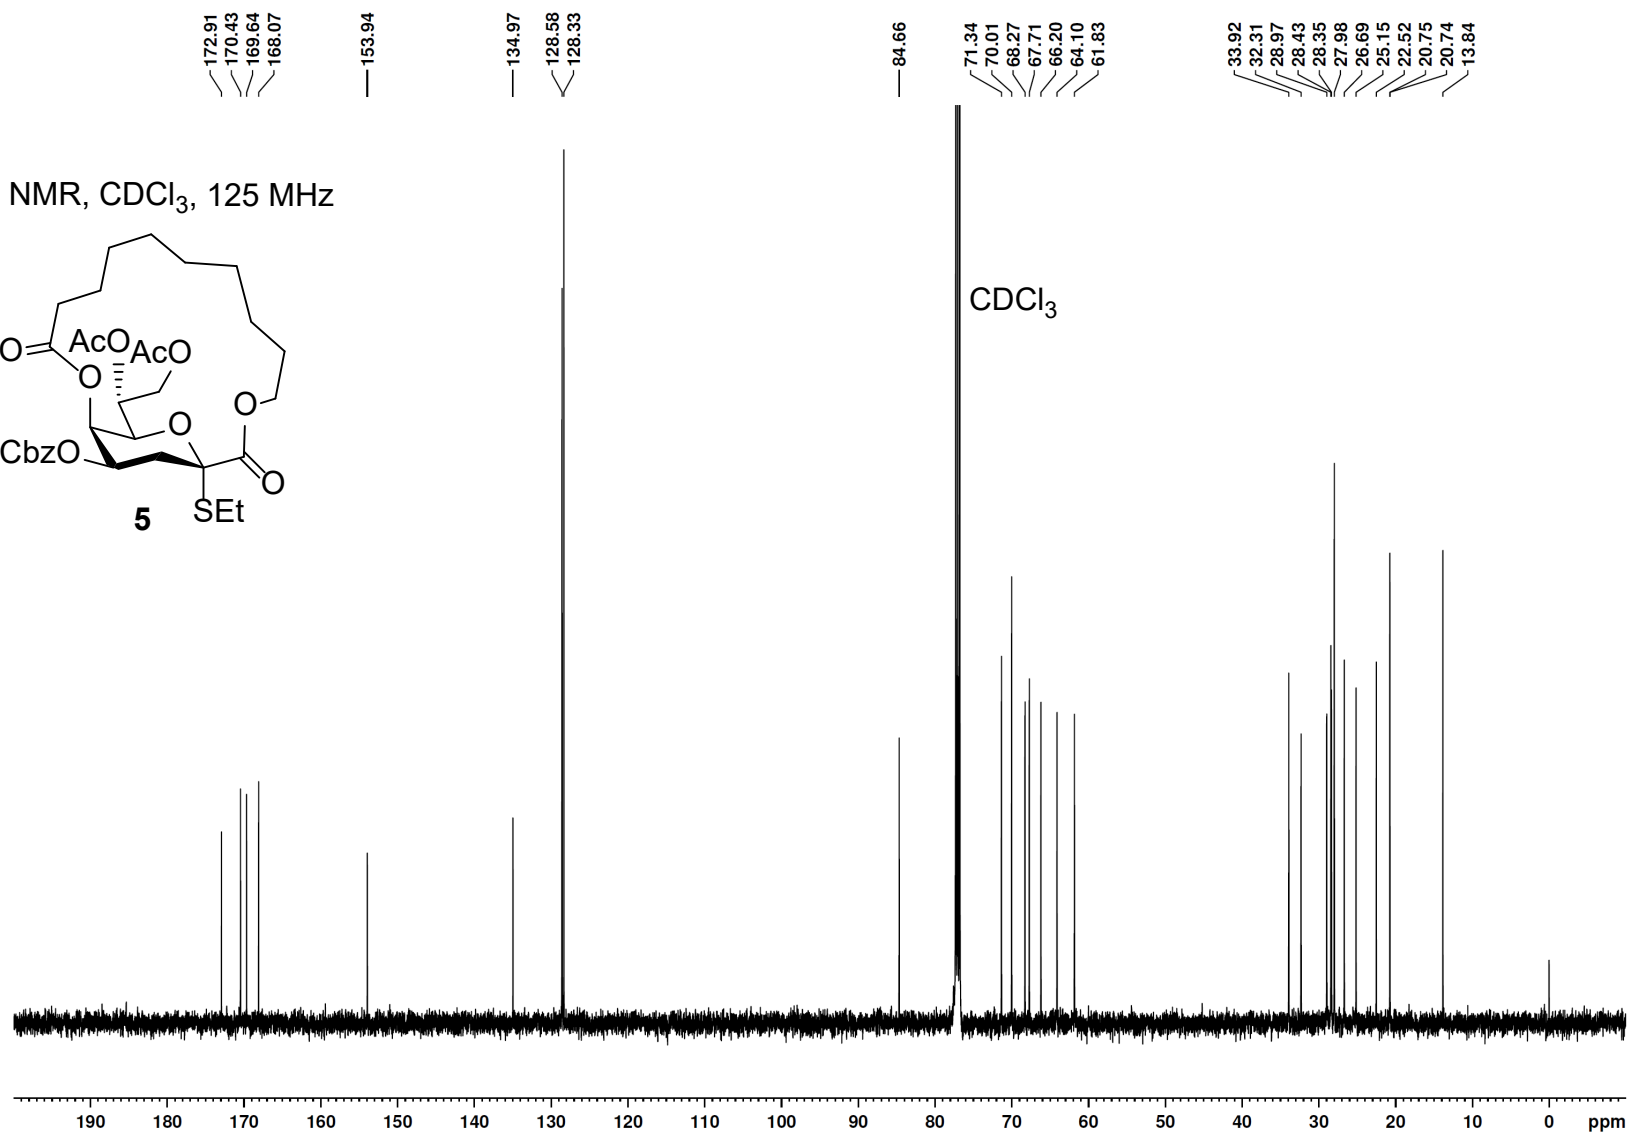

$^1\text{H}$  NMR,  $\text{CDCl}_3$ , 500 MHz

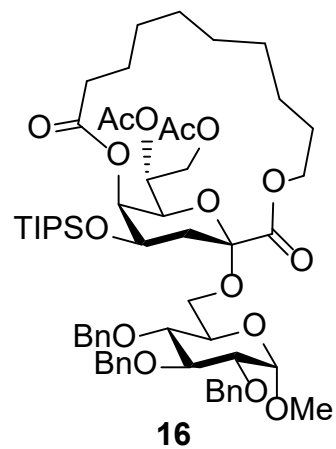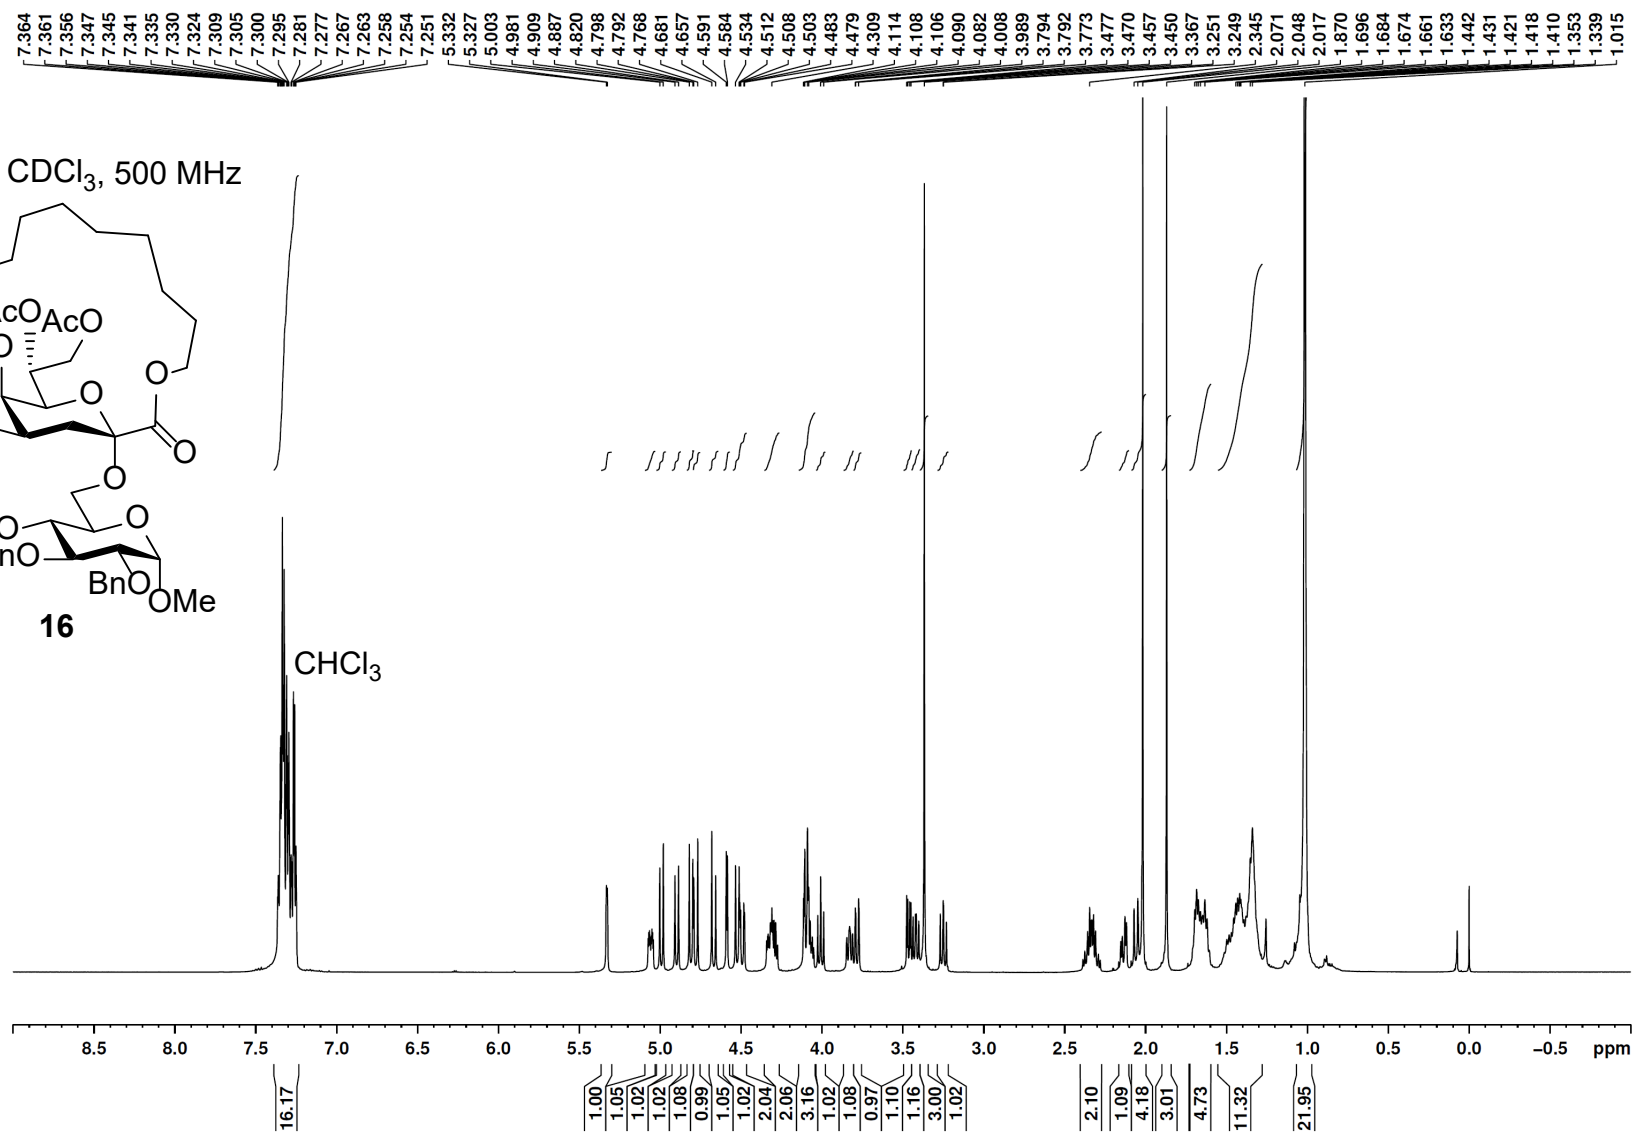



$^{13}\text{C}$  NMR,  $\text{CDCl}_3$ , 125 MHz

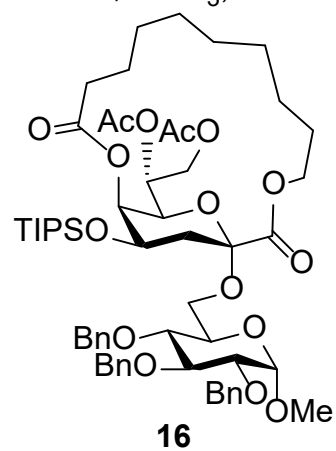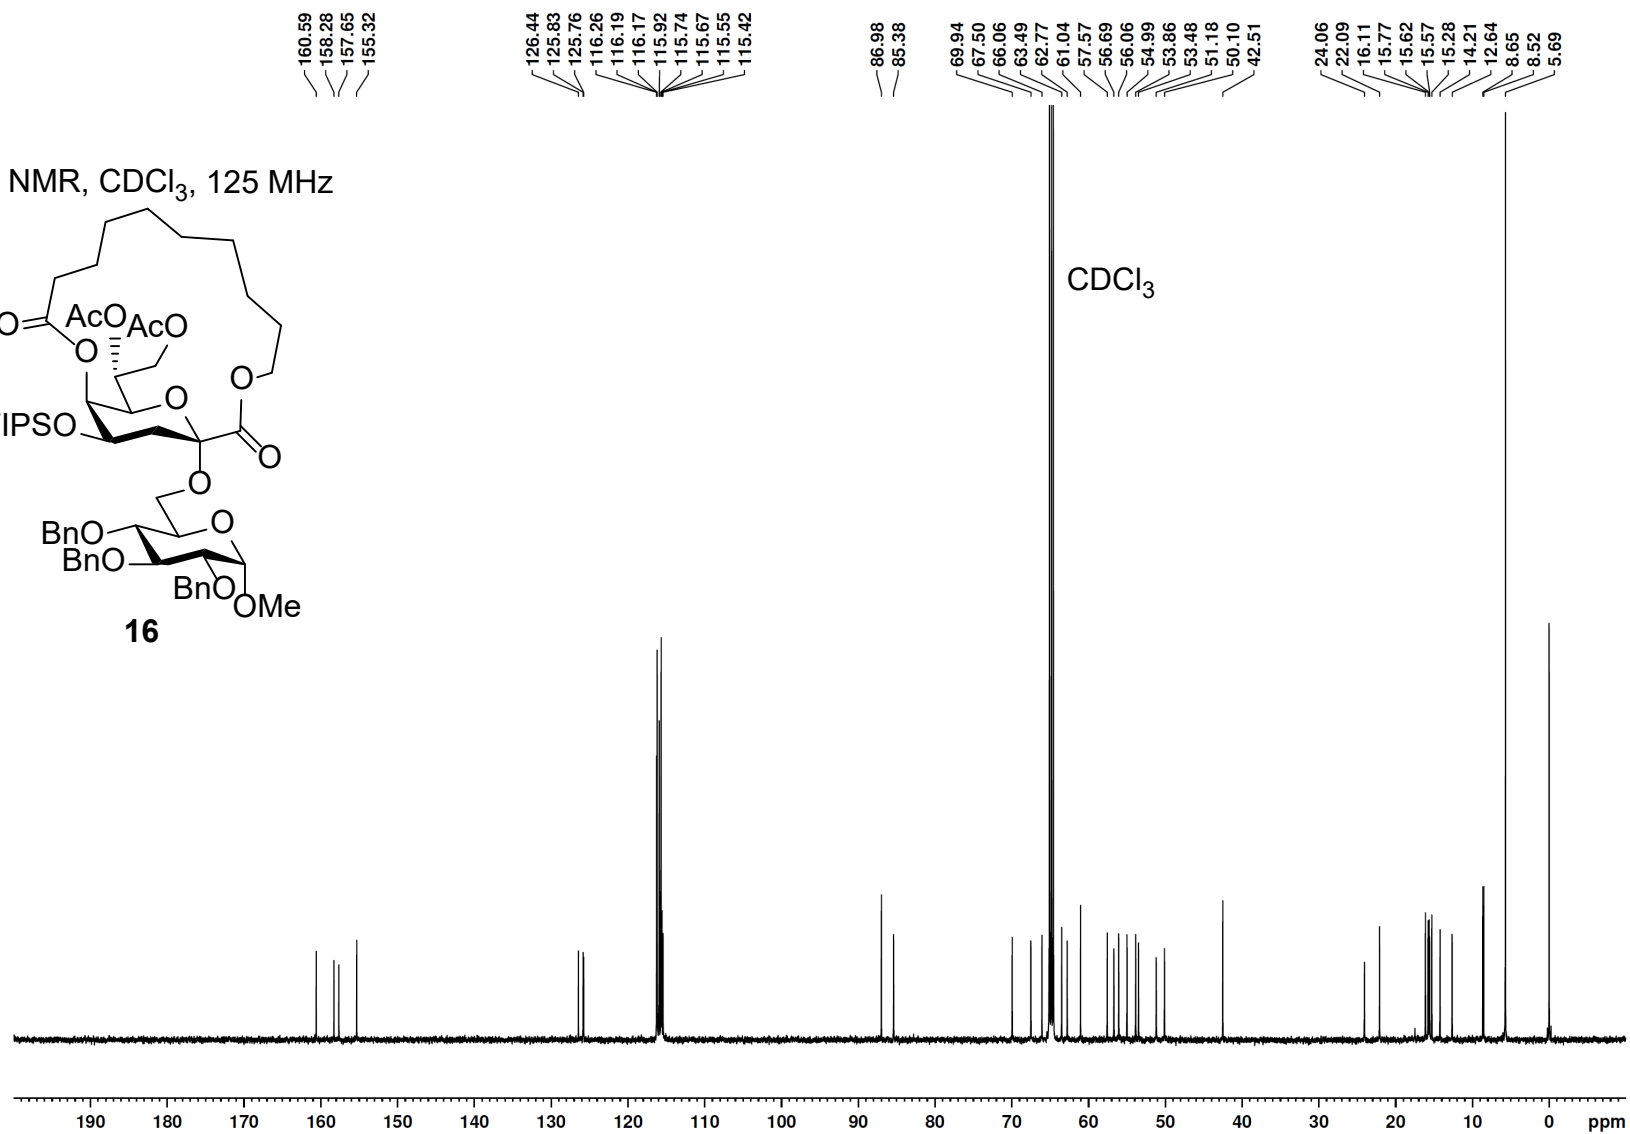

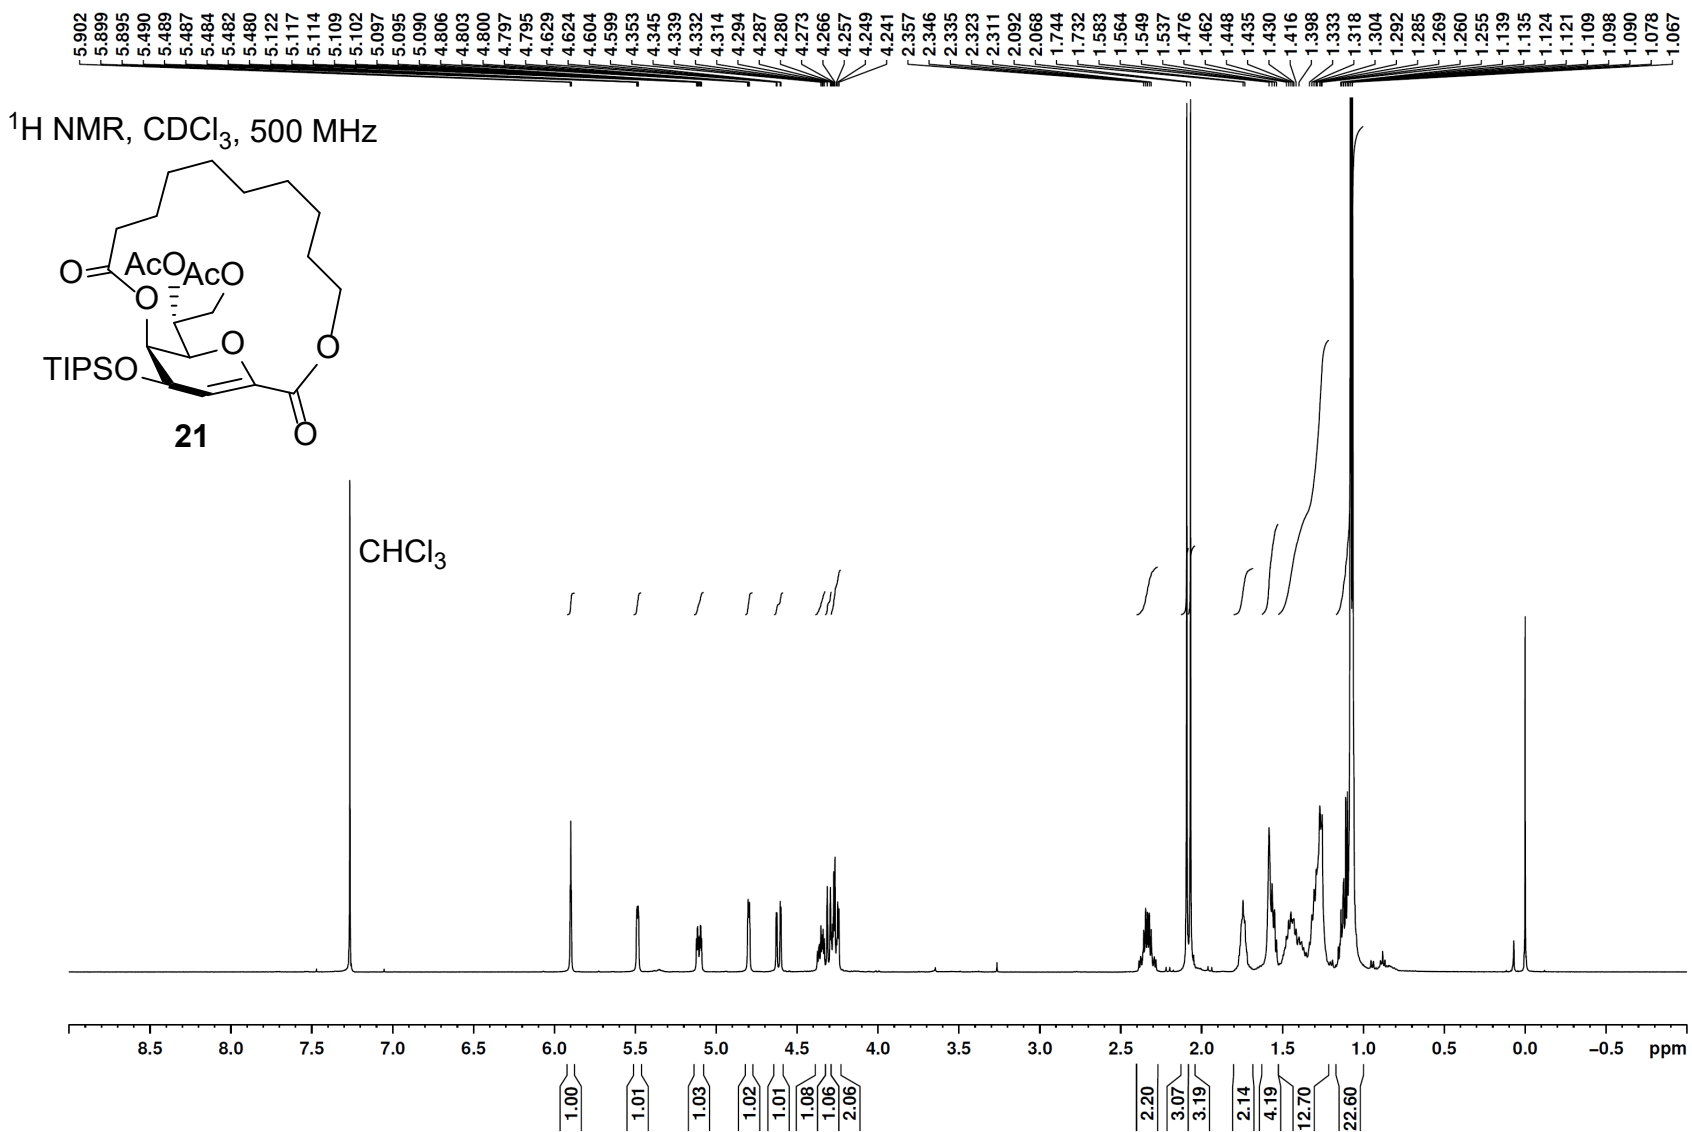

$^{13}\text{C}$  NMR,  $\text{CDCl}_3$ , 125 MHz

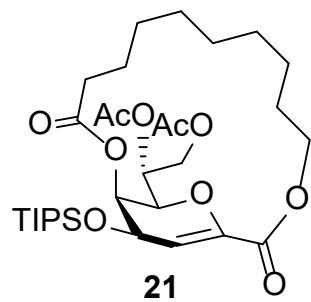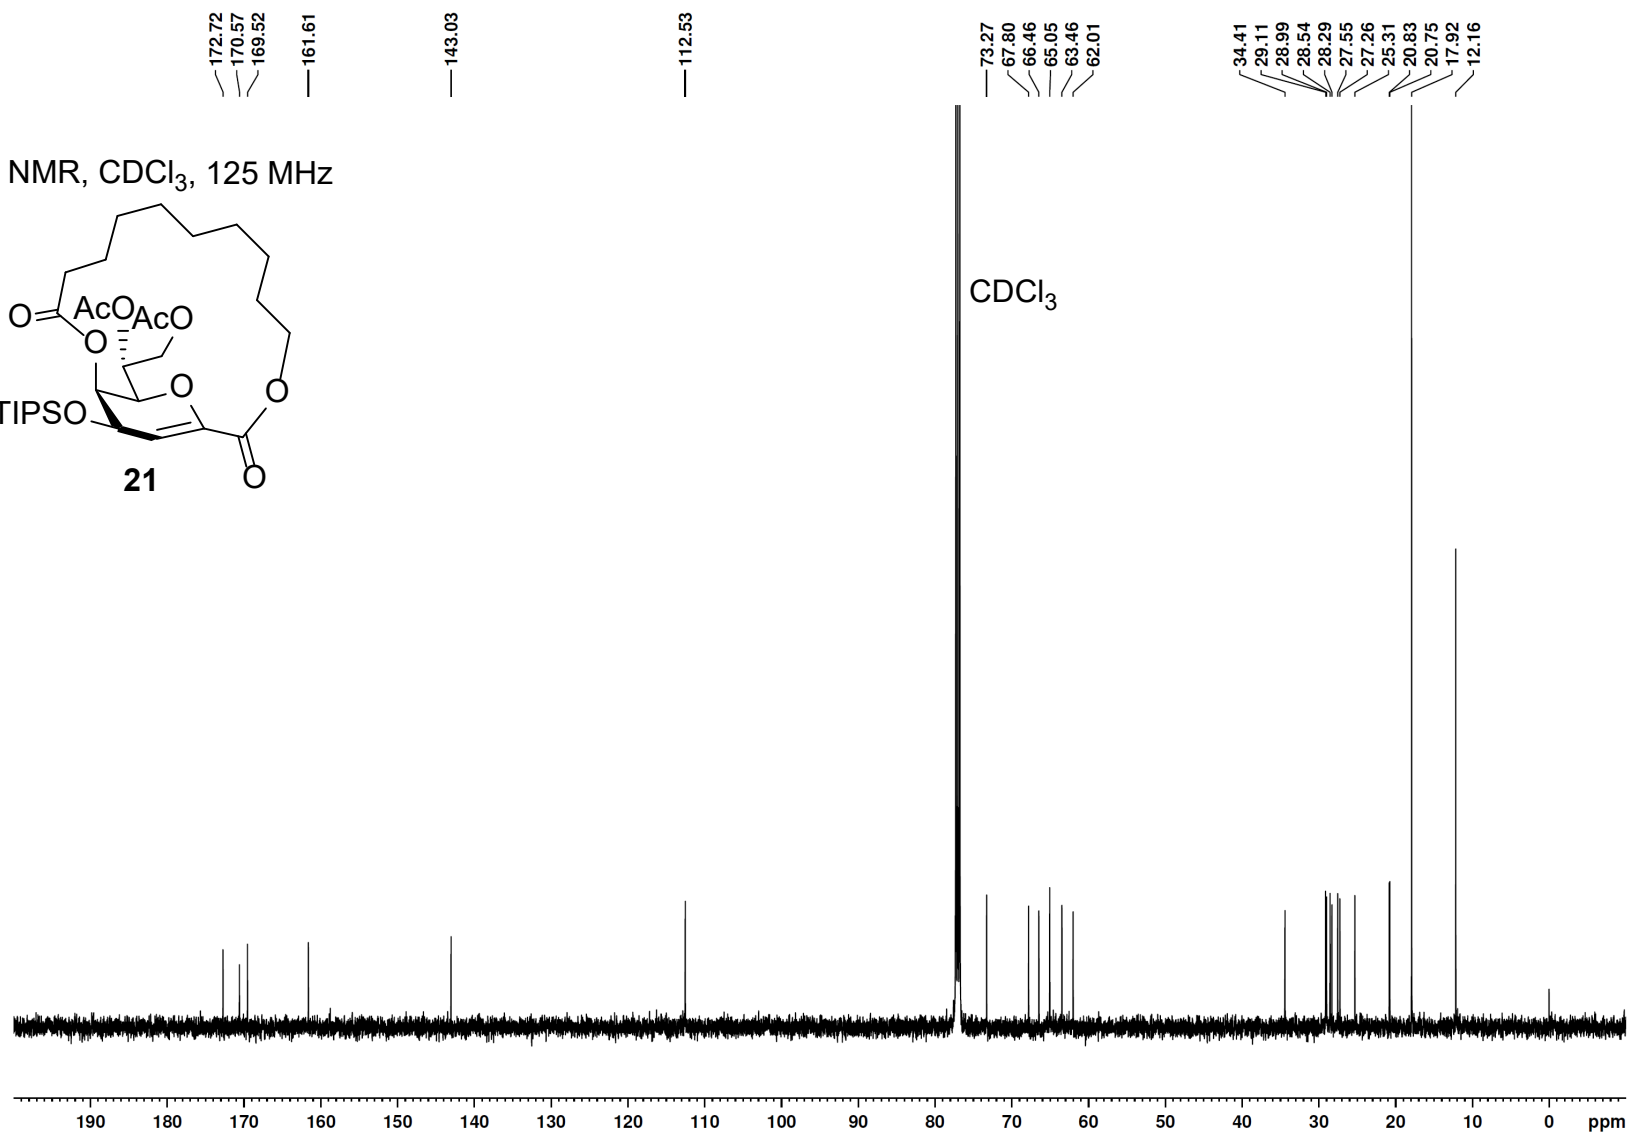

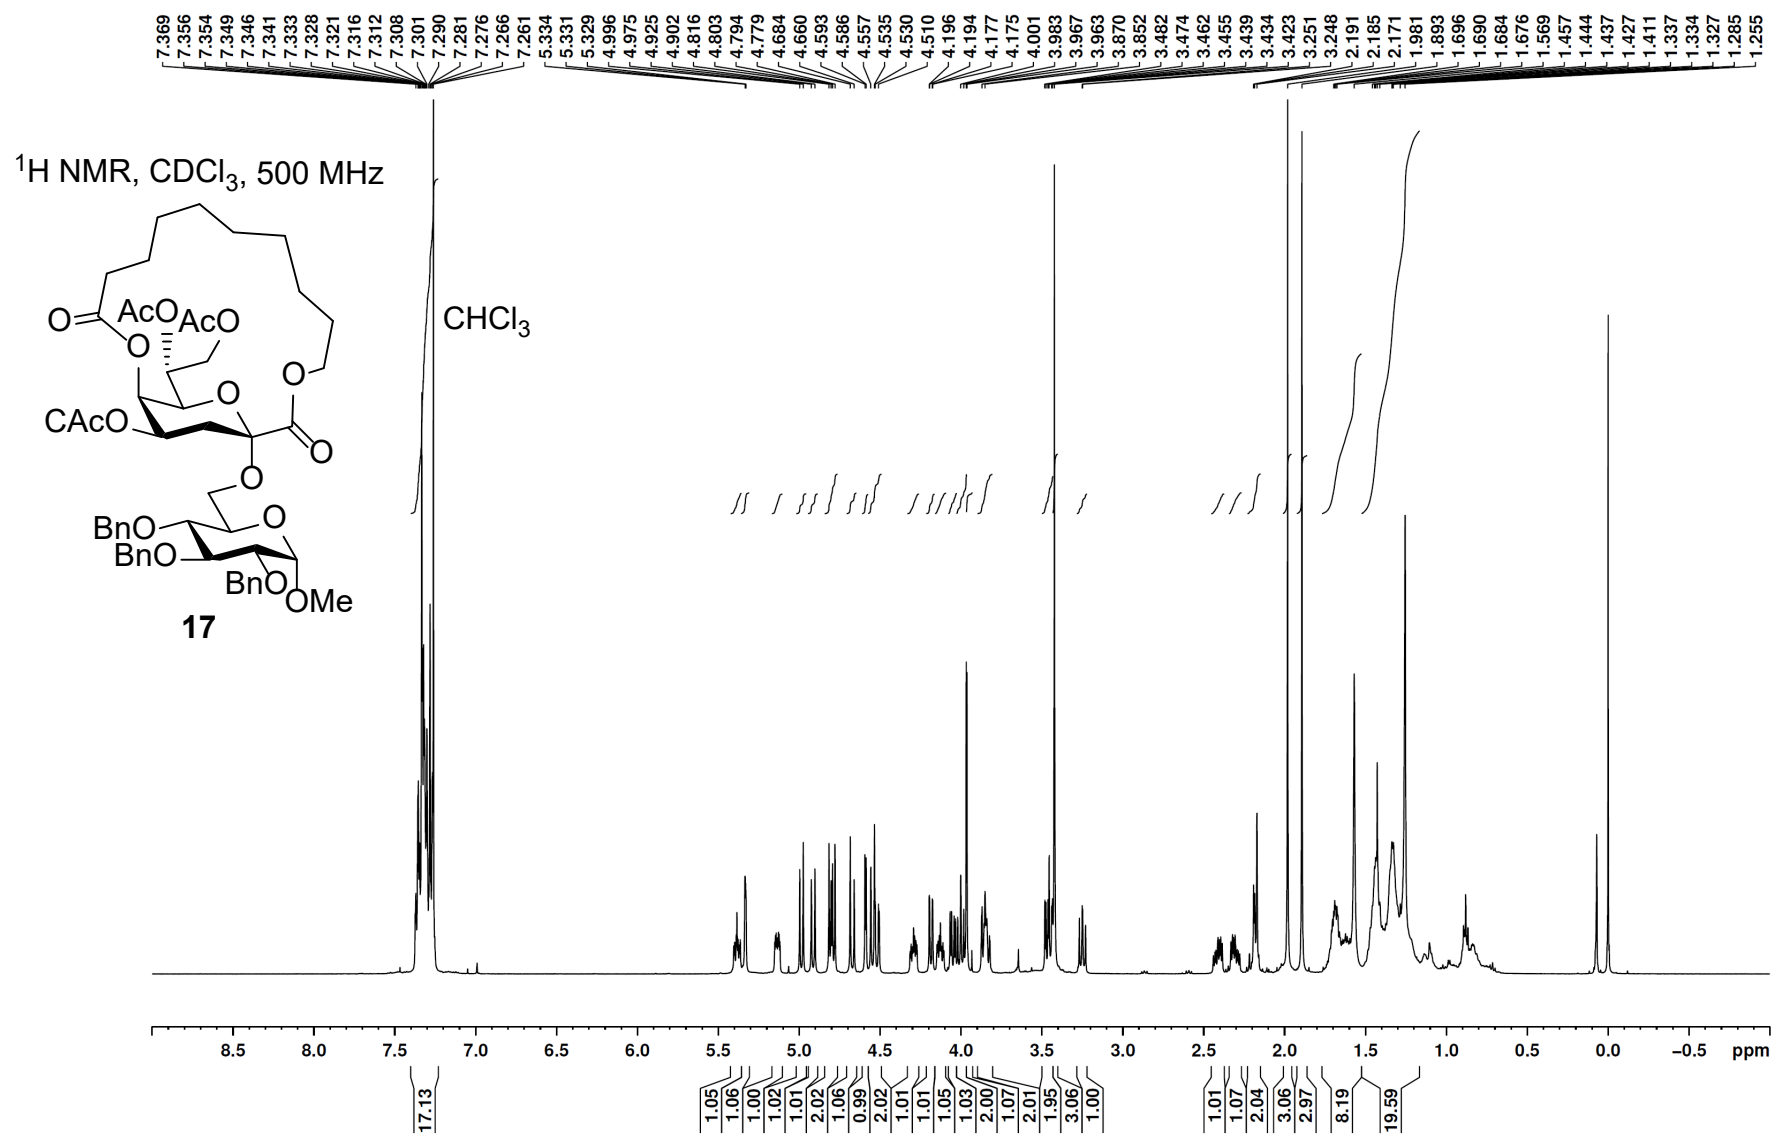

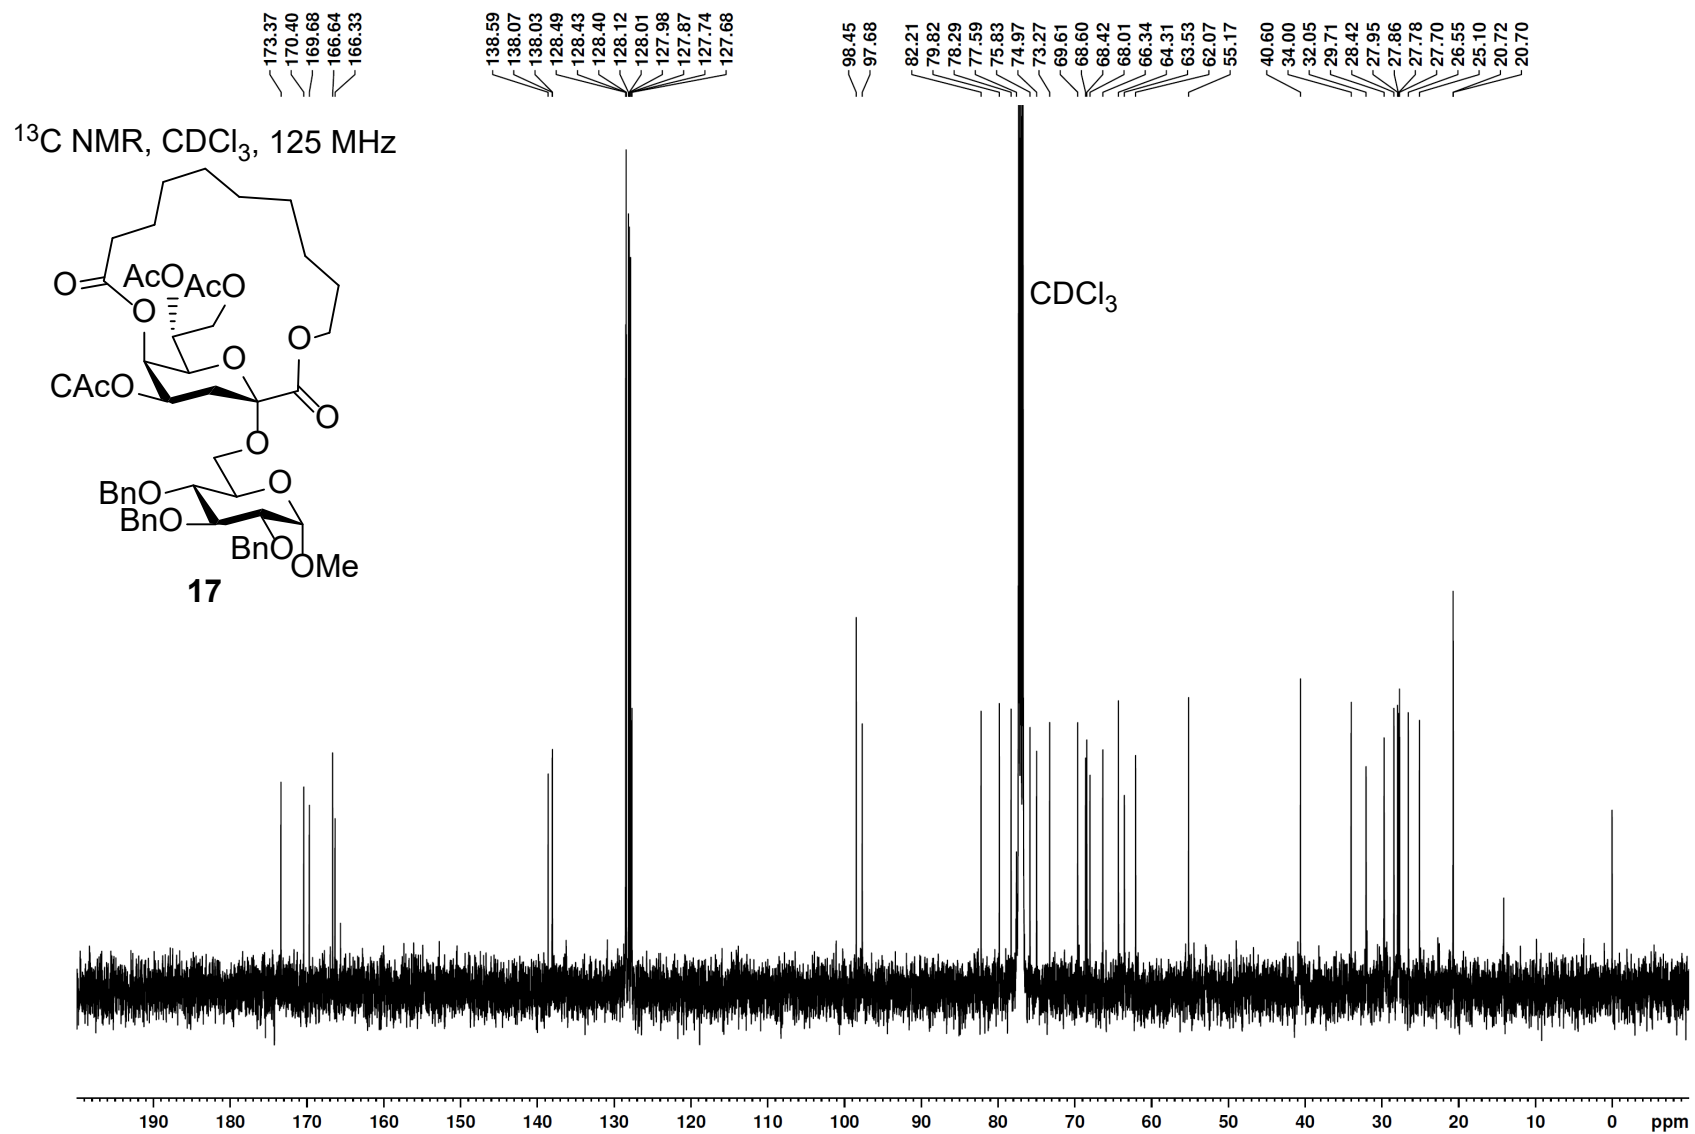

$^1\text{H}$  NMR,  $\text{CDCl}_3$ , 500 MHz

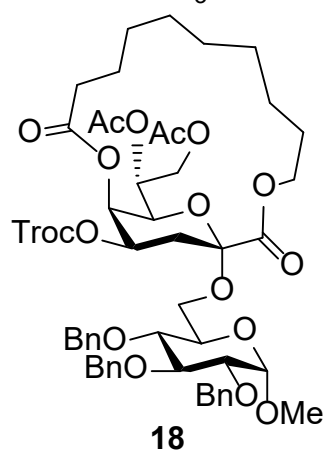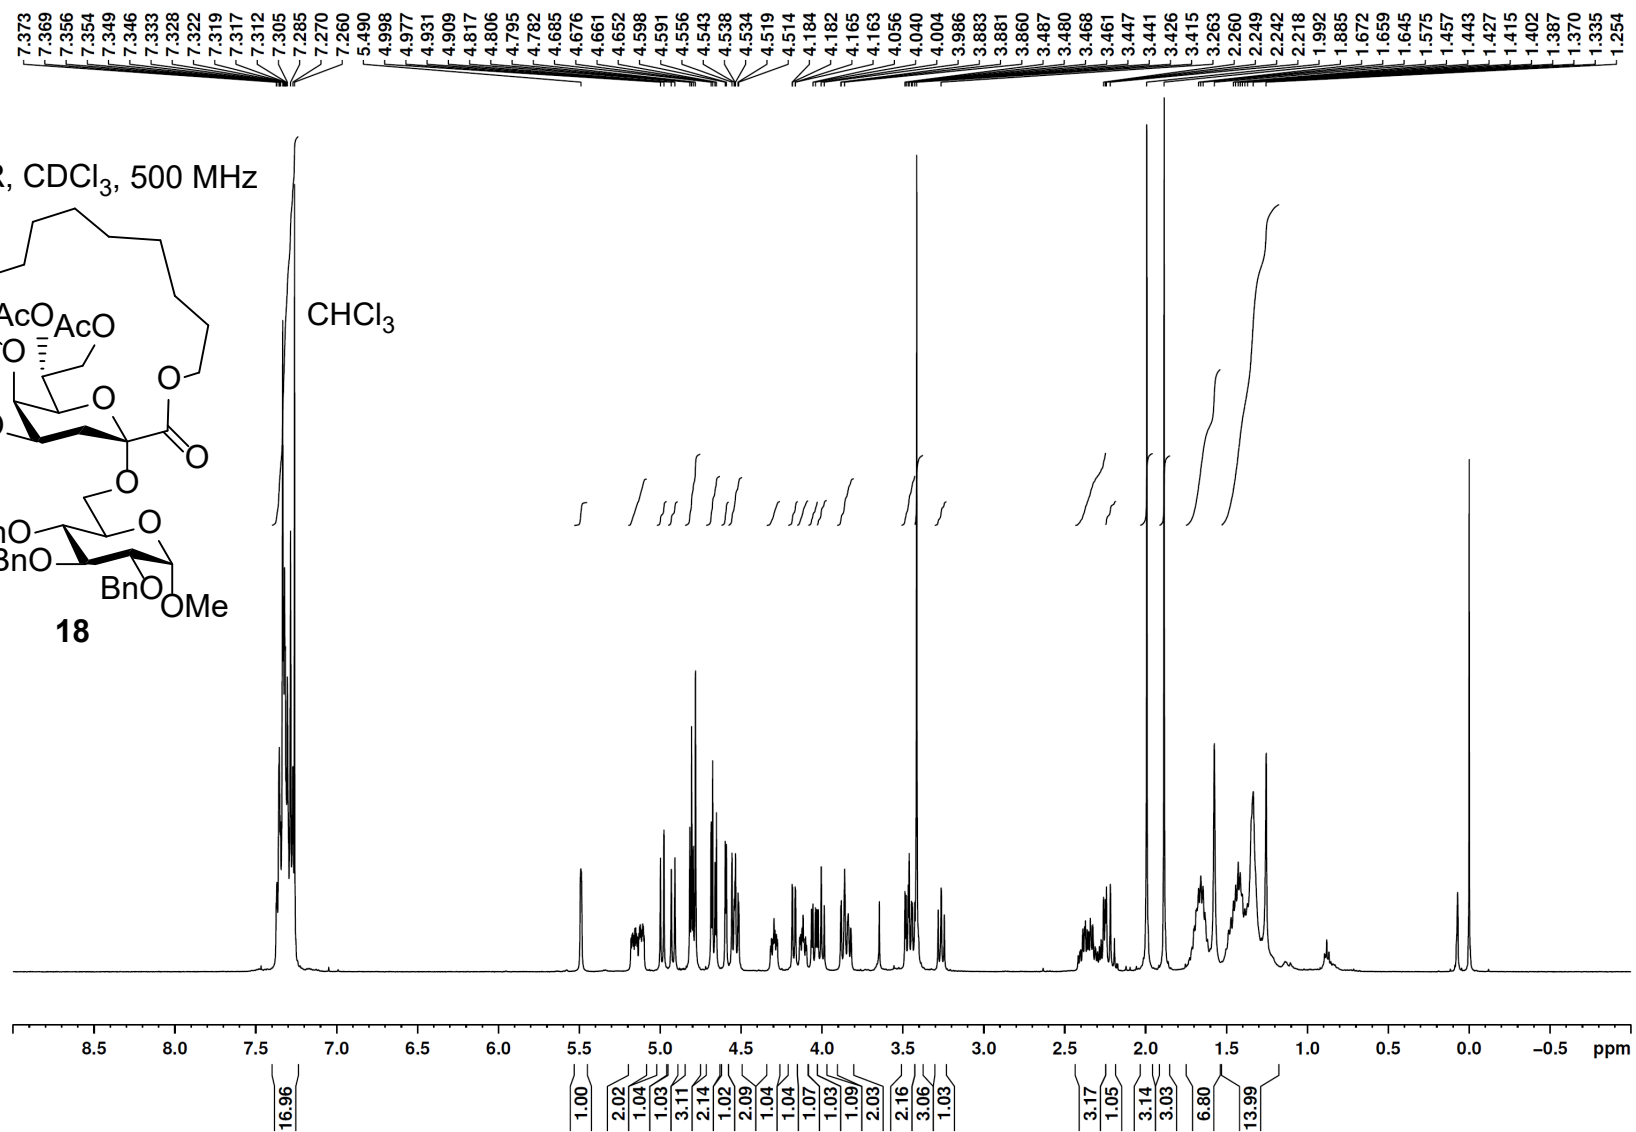

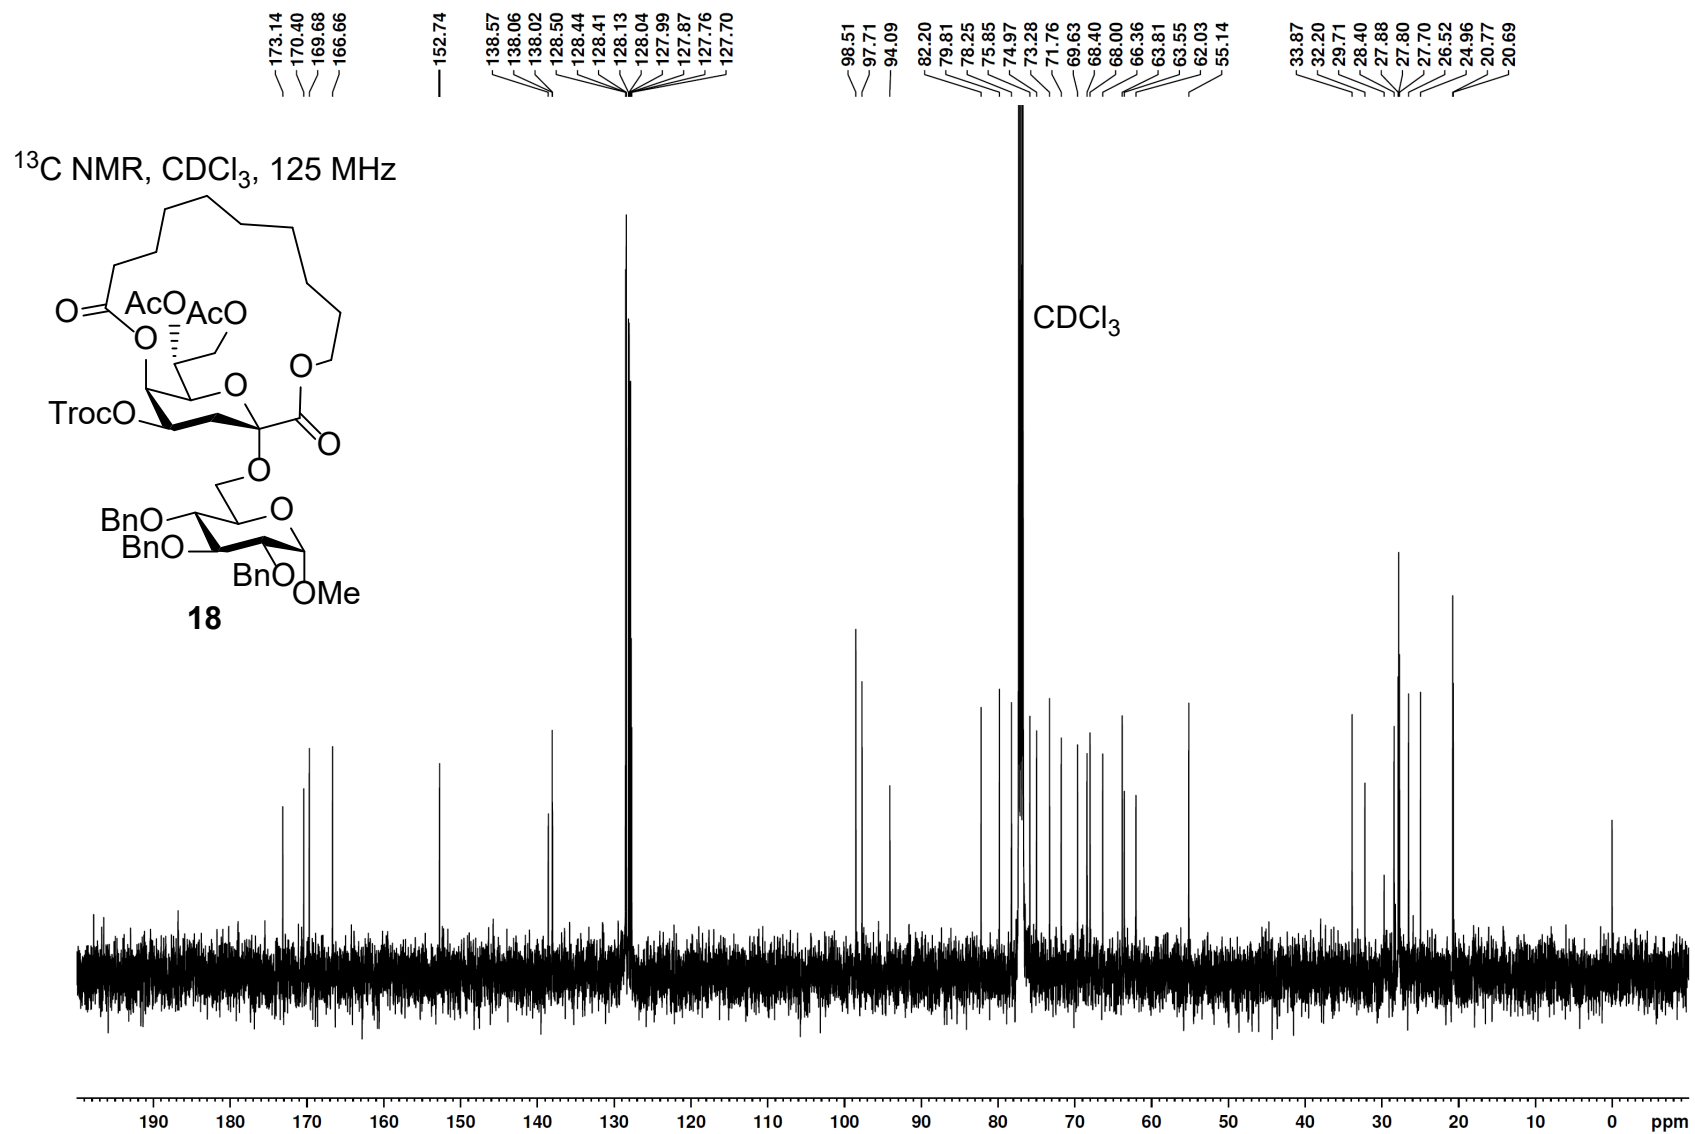

$^1\text{H}$  NMR,  $\text{CDCl}_3$ , 500 MHz

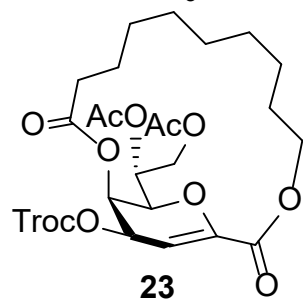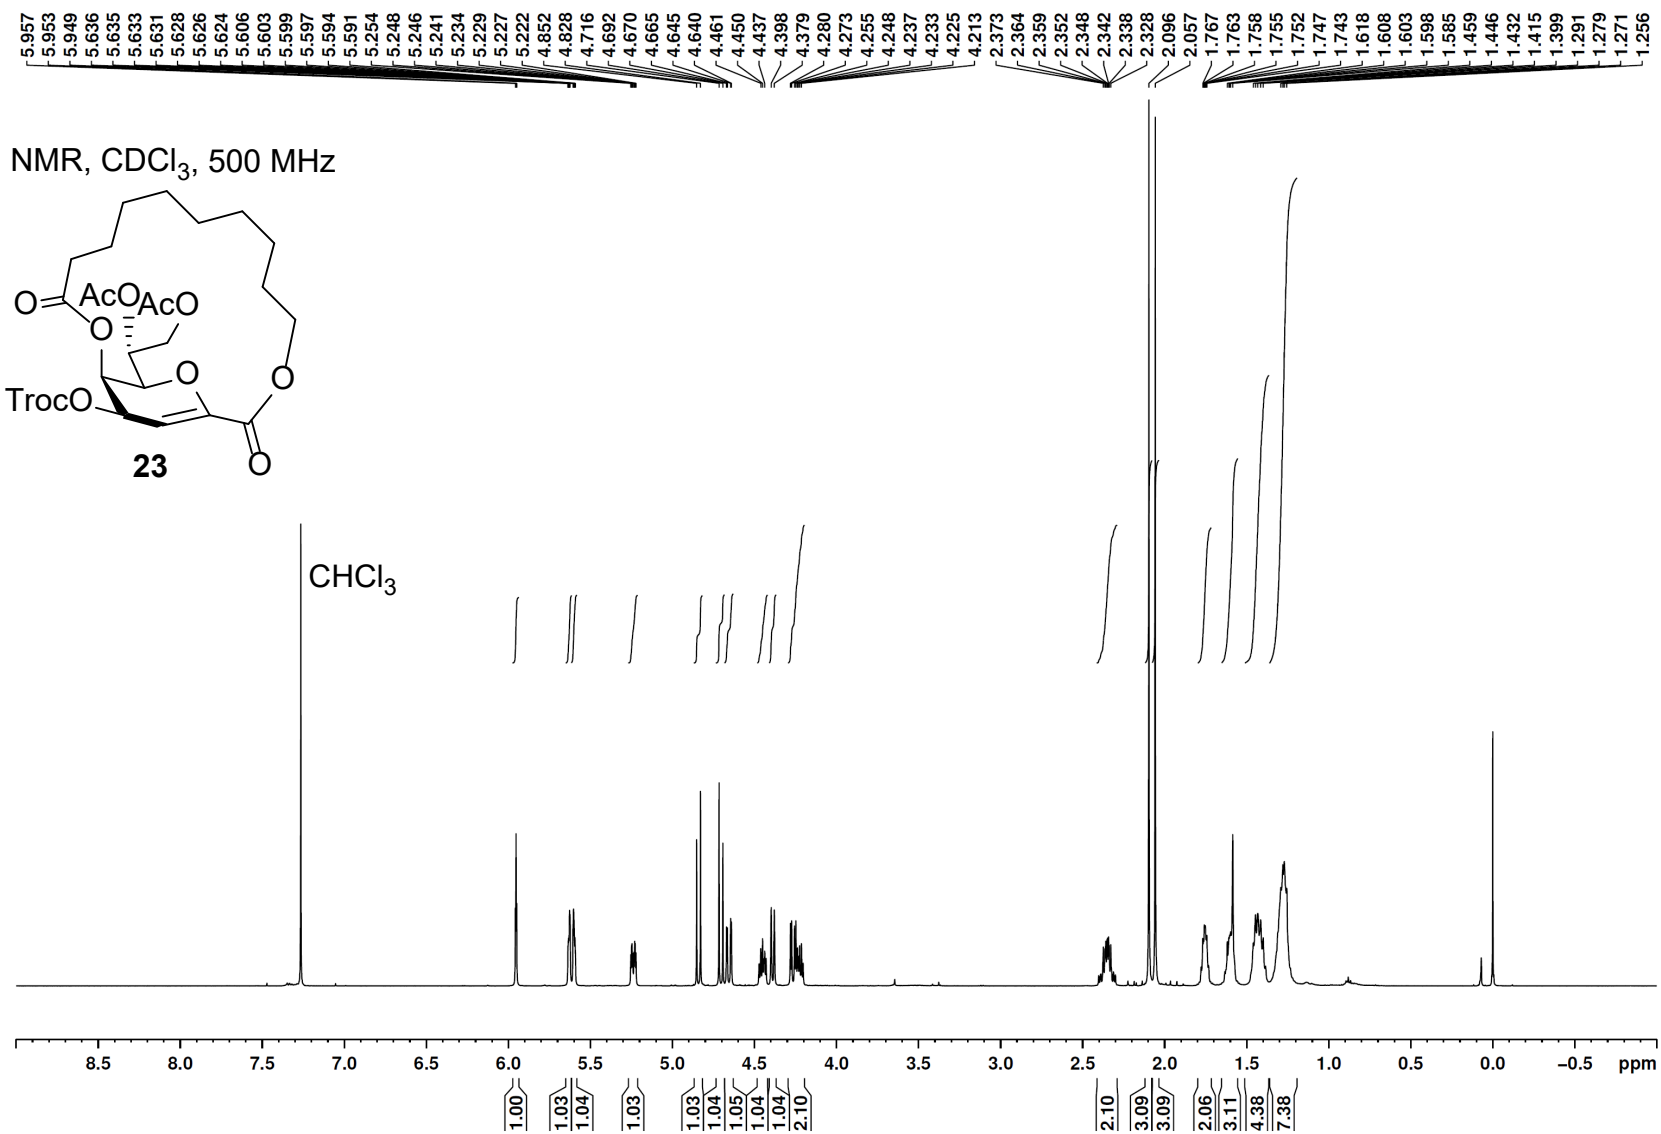



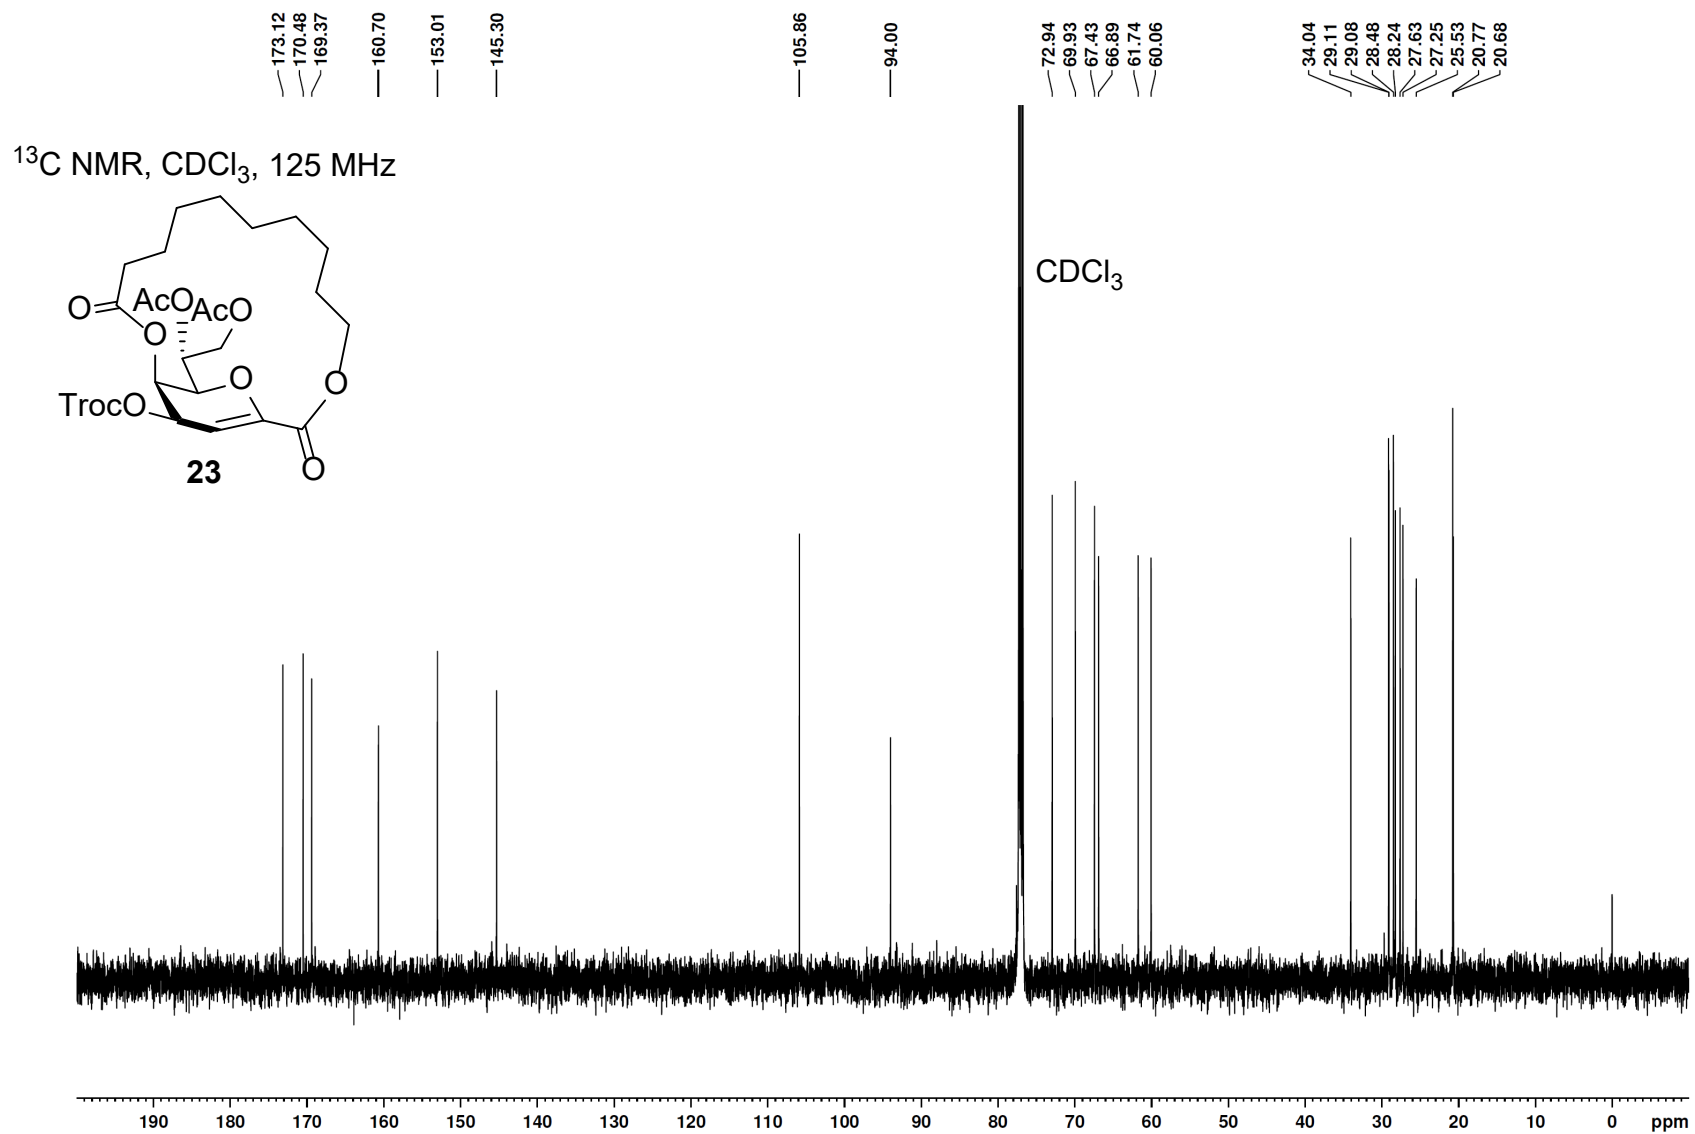

$^1\text{H}$  NMR,  $\text{CDCl}_3$ , 500 MHz

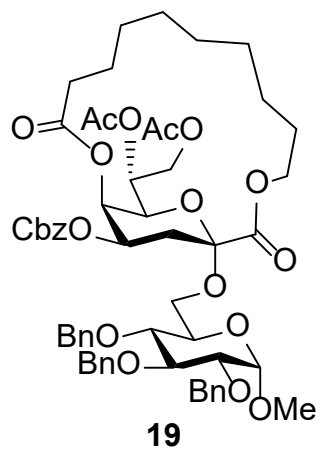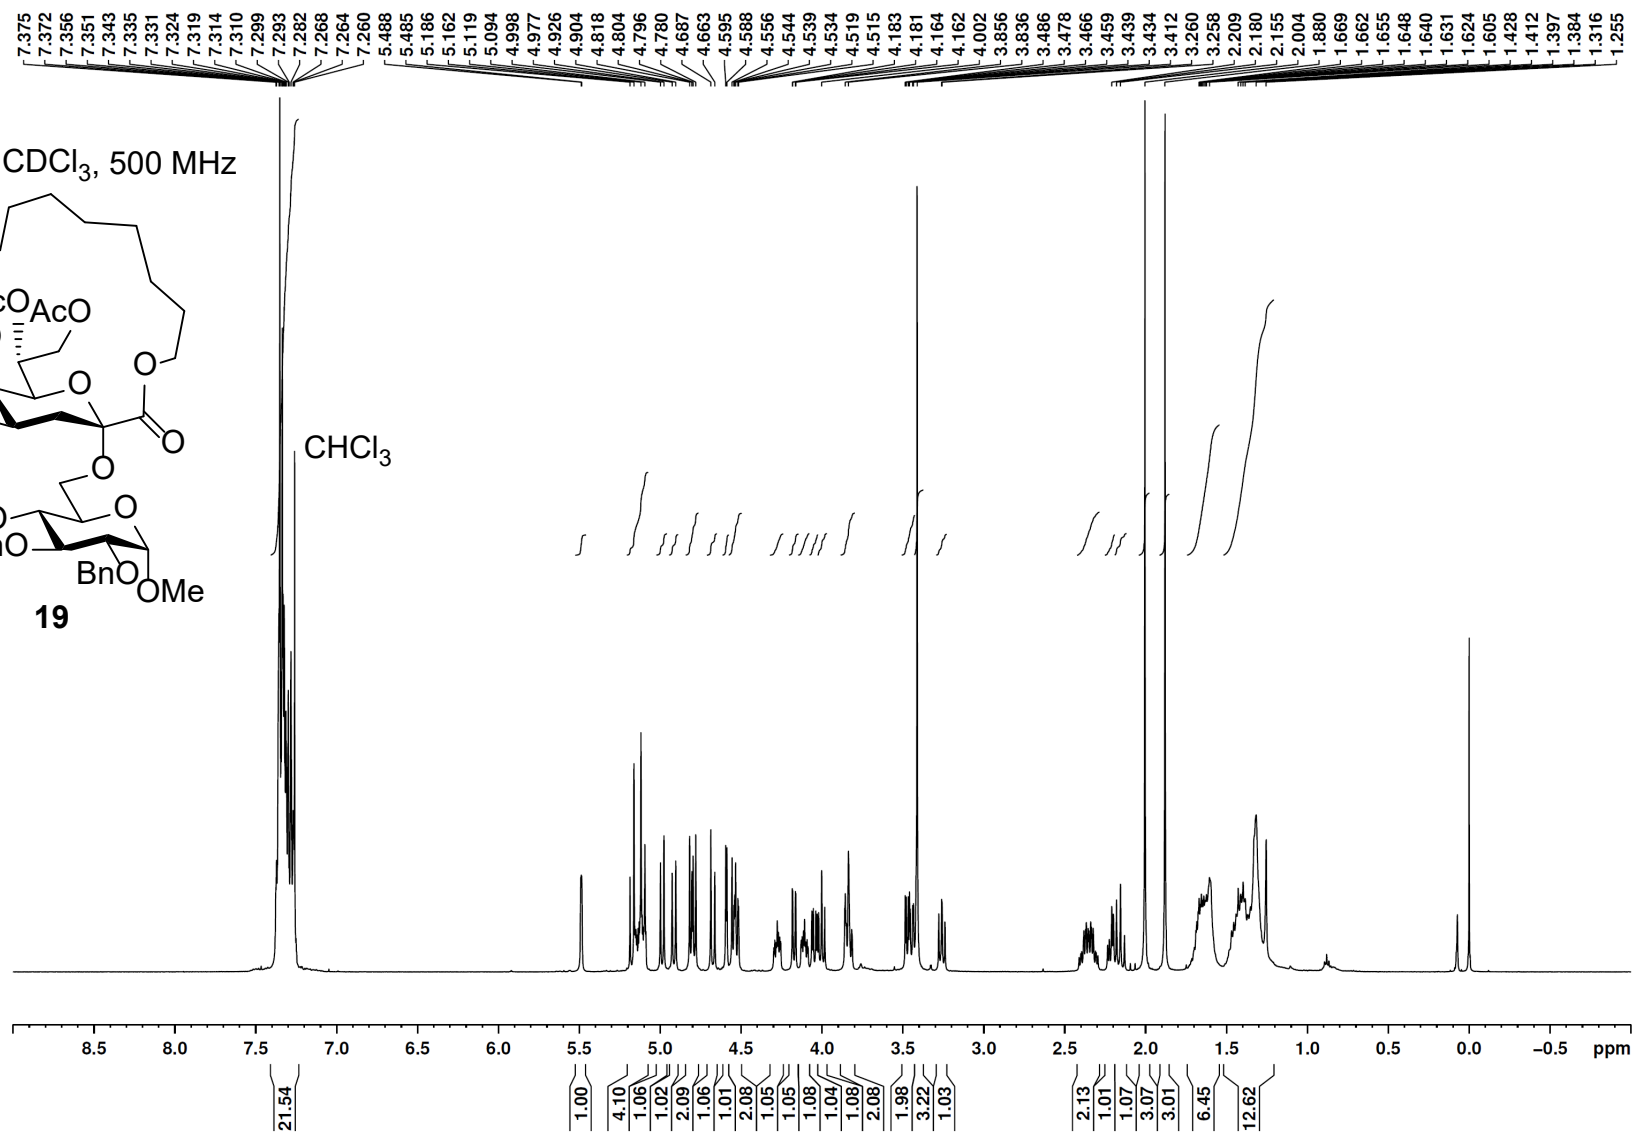

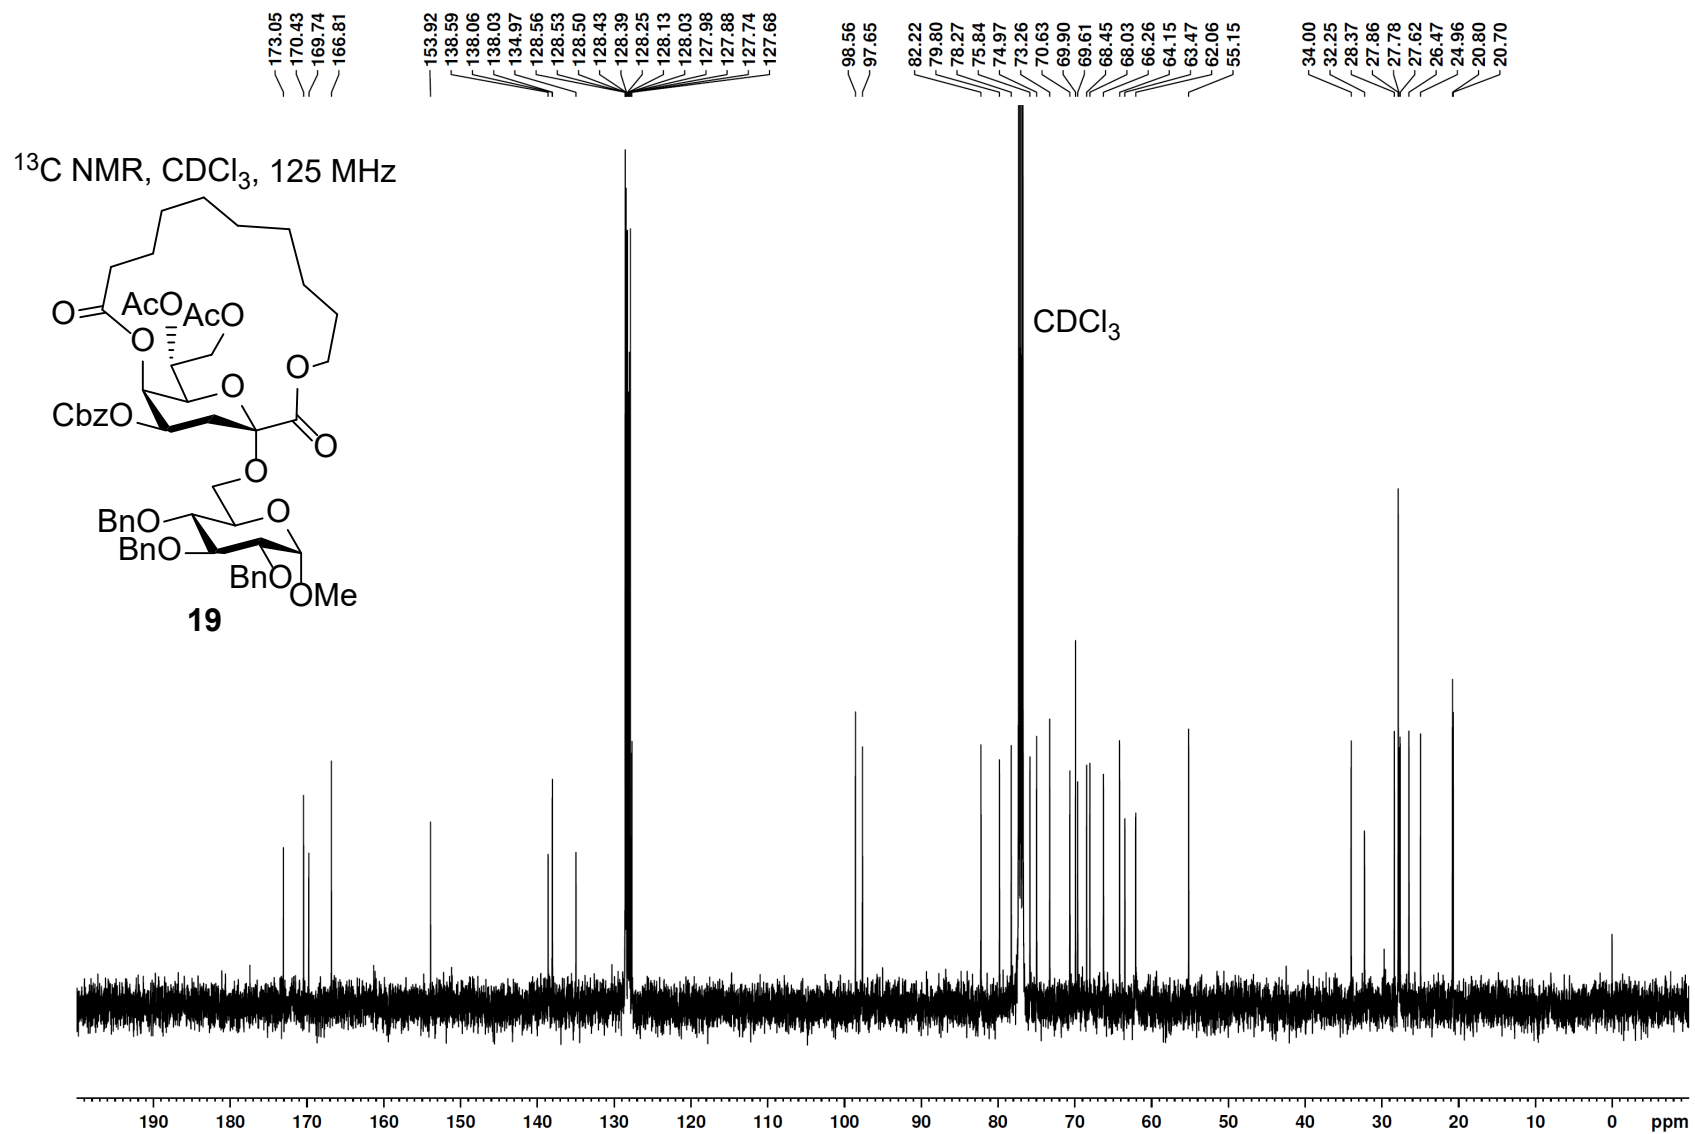

$^1\text{H}$  NMR,  $\text{CDCl}_3$ , 500 MHz

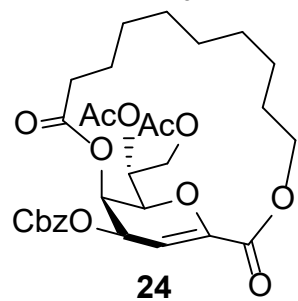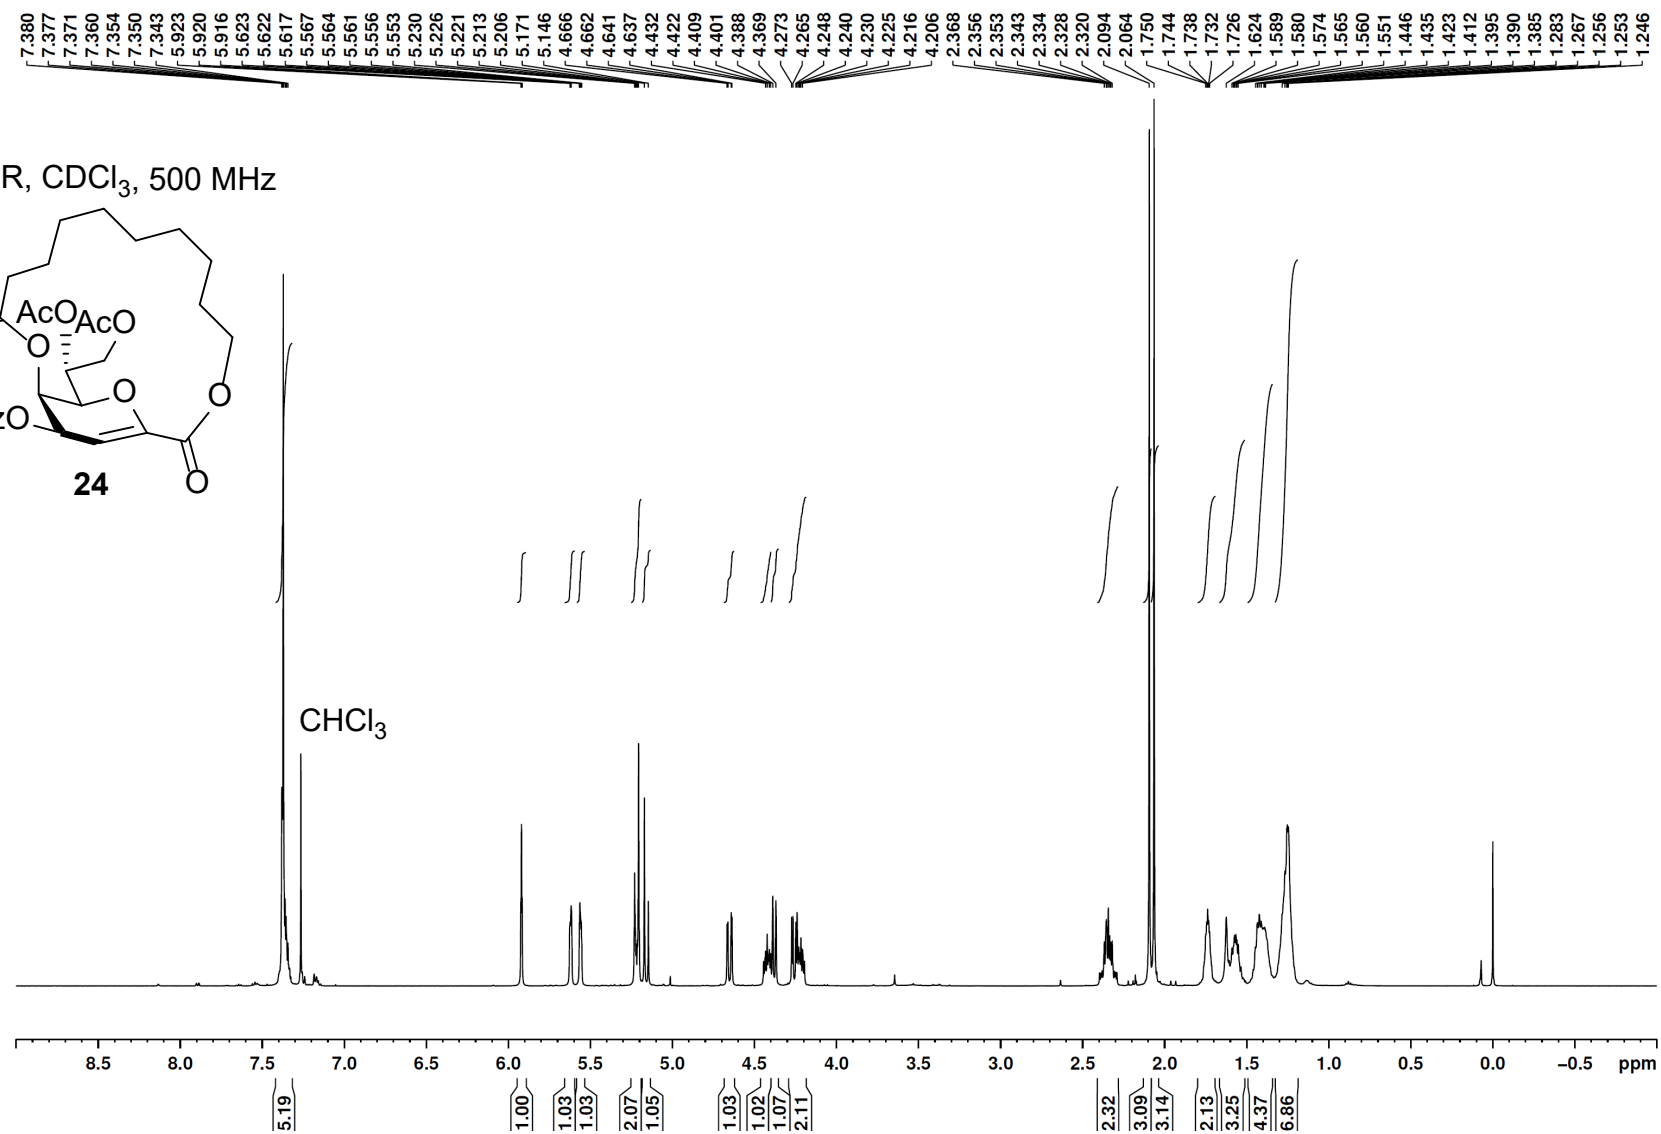

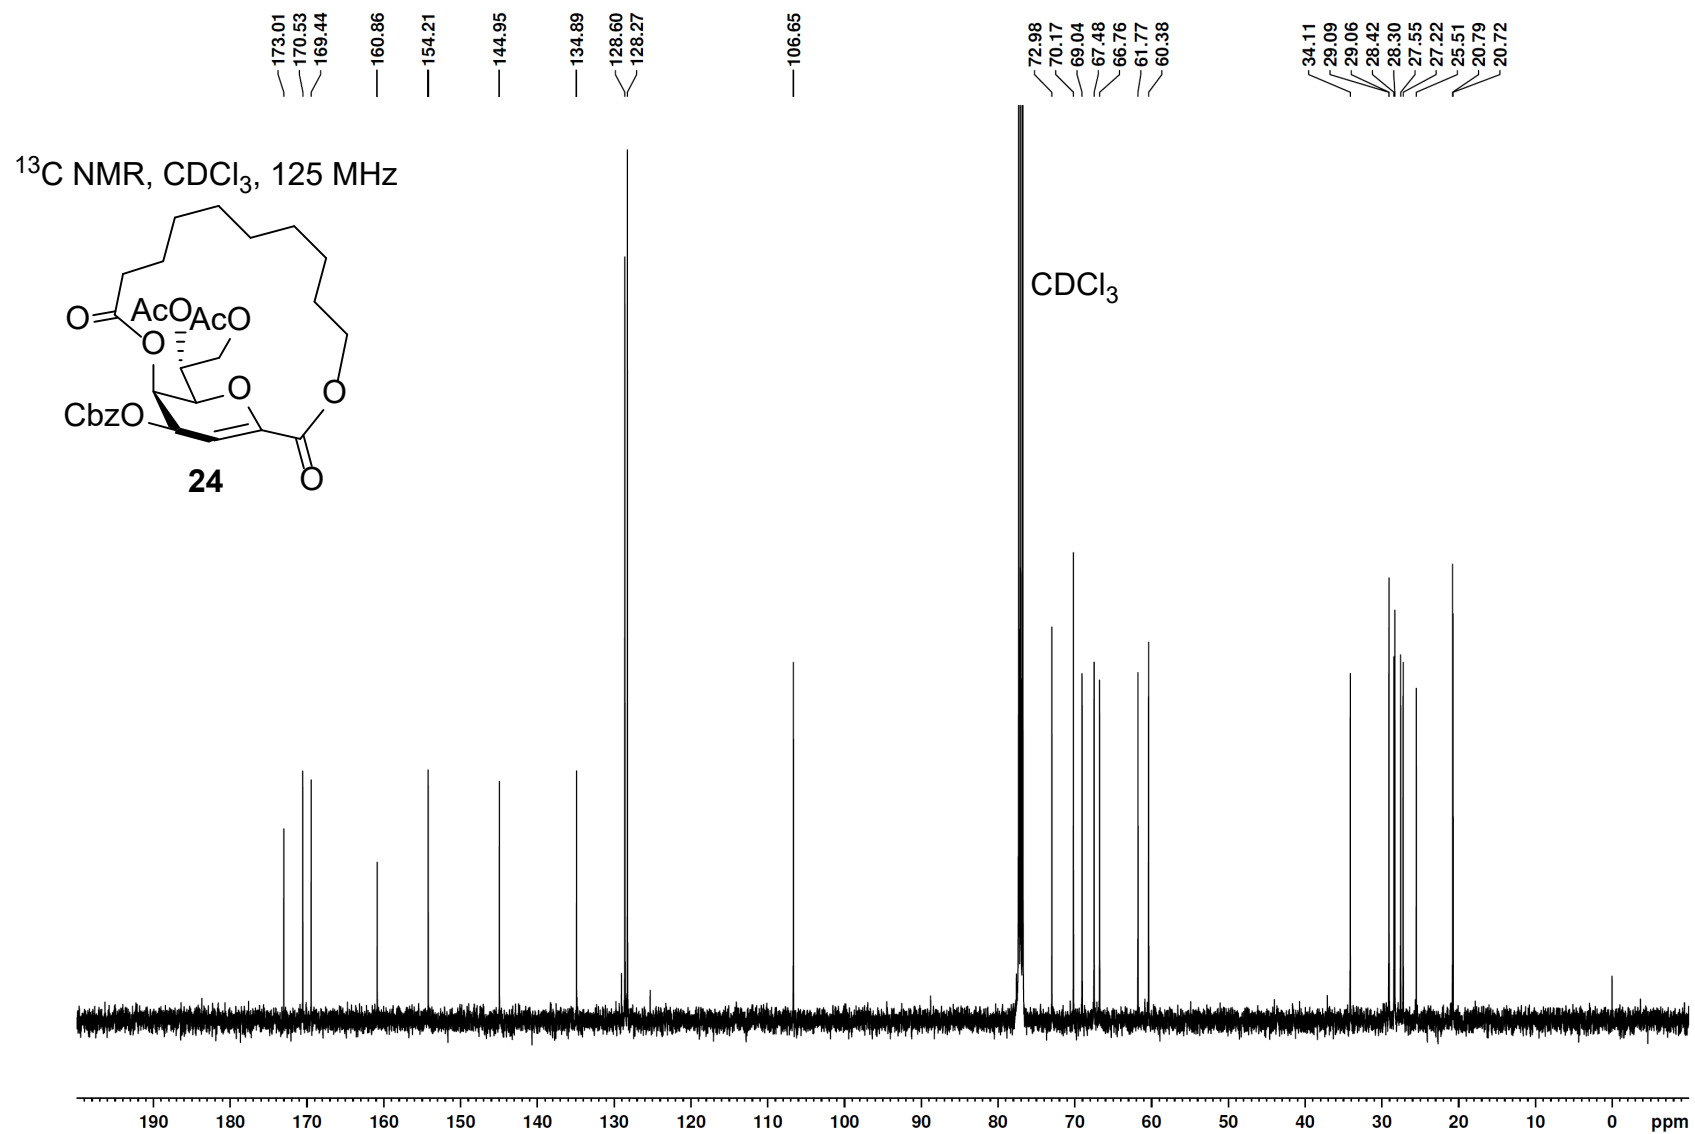

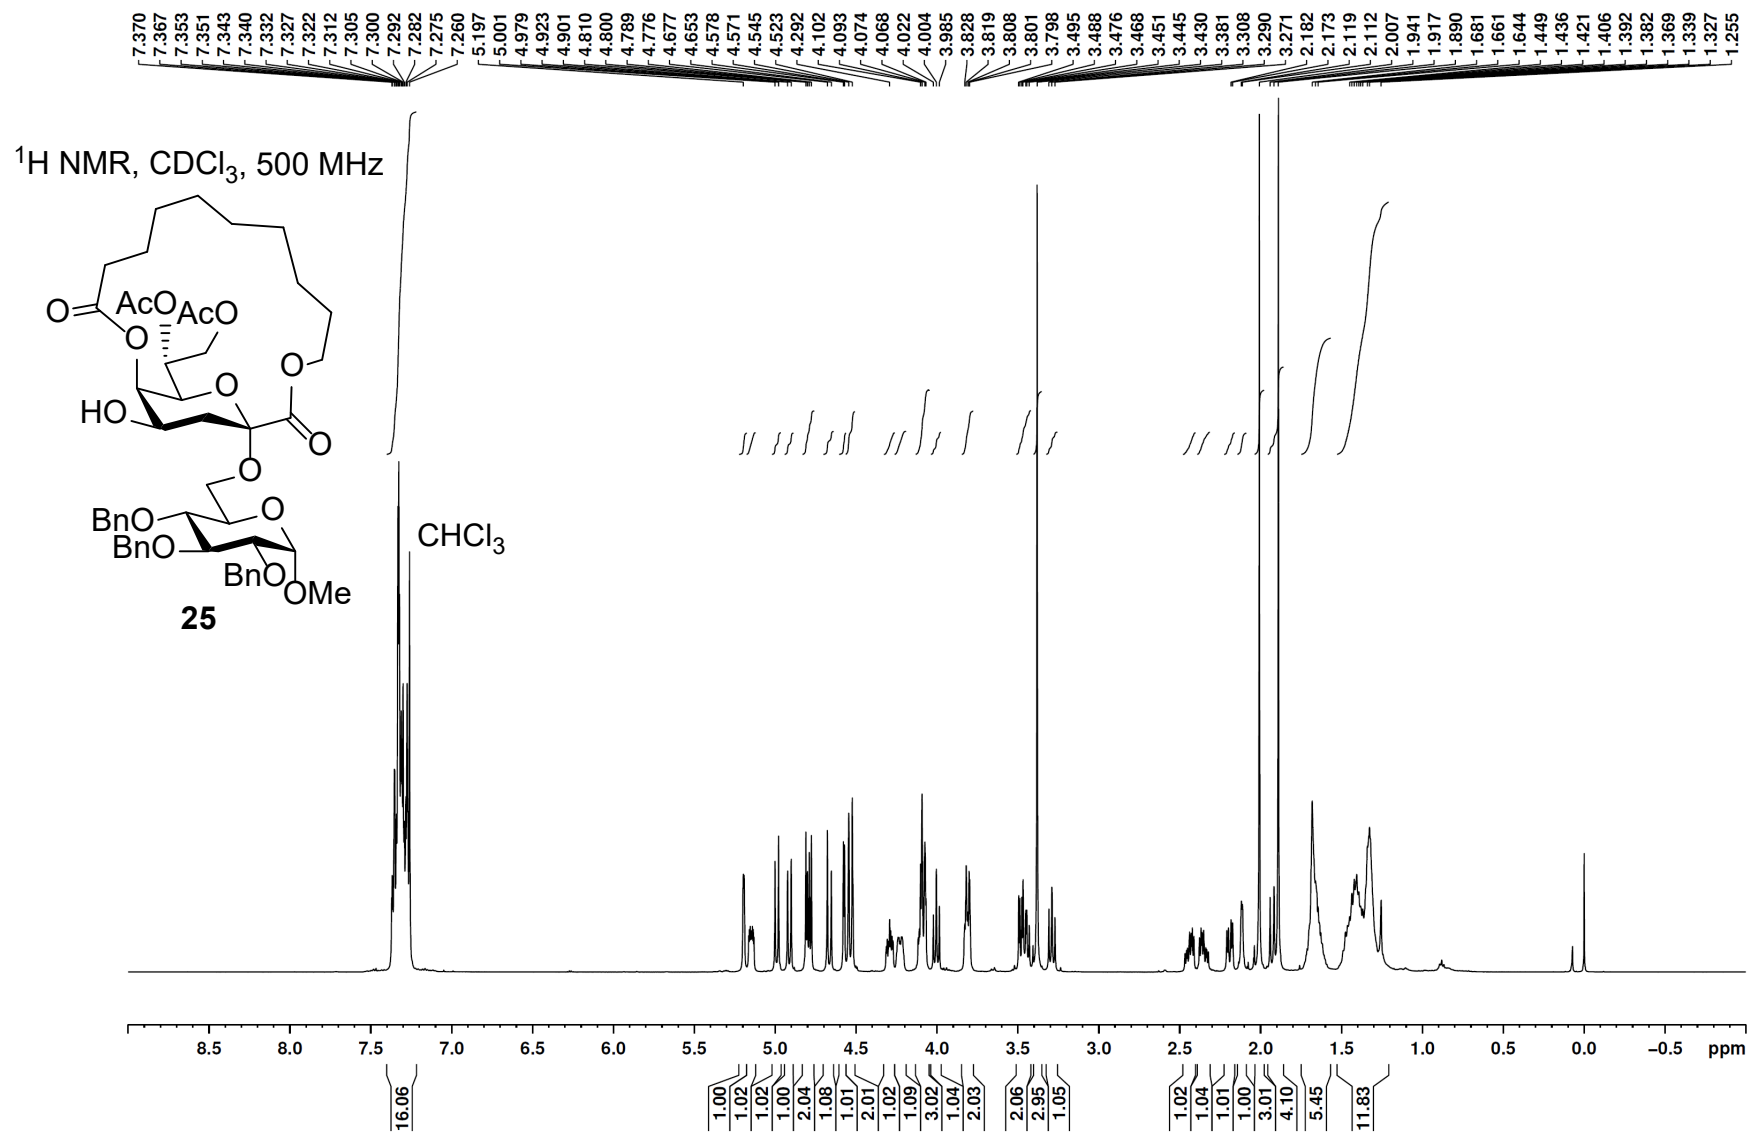

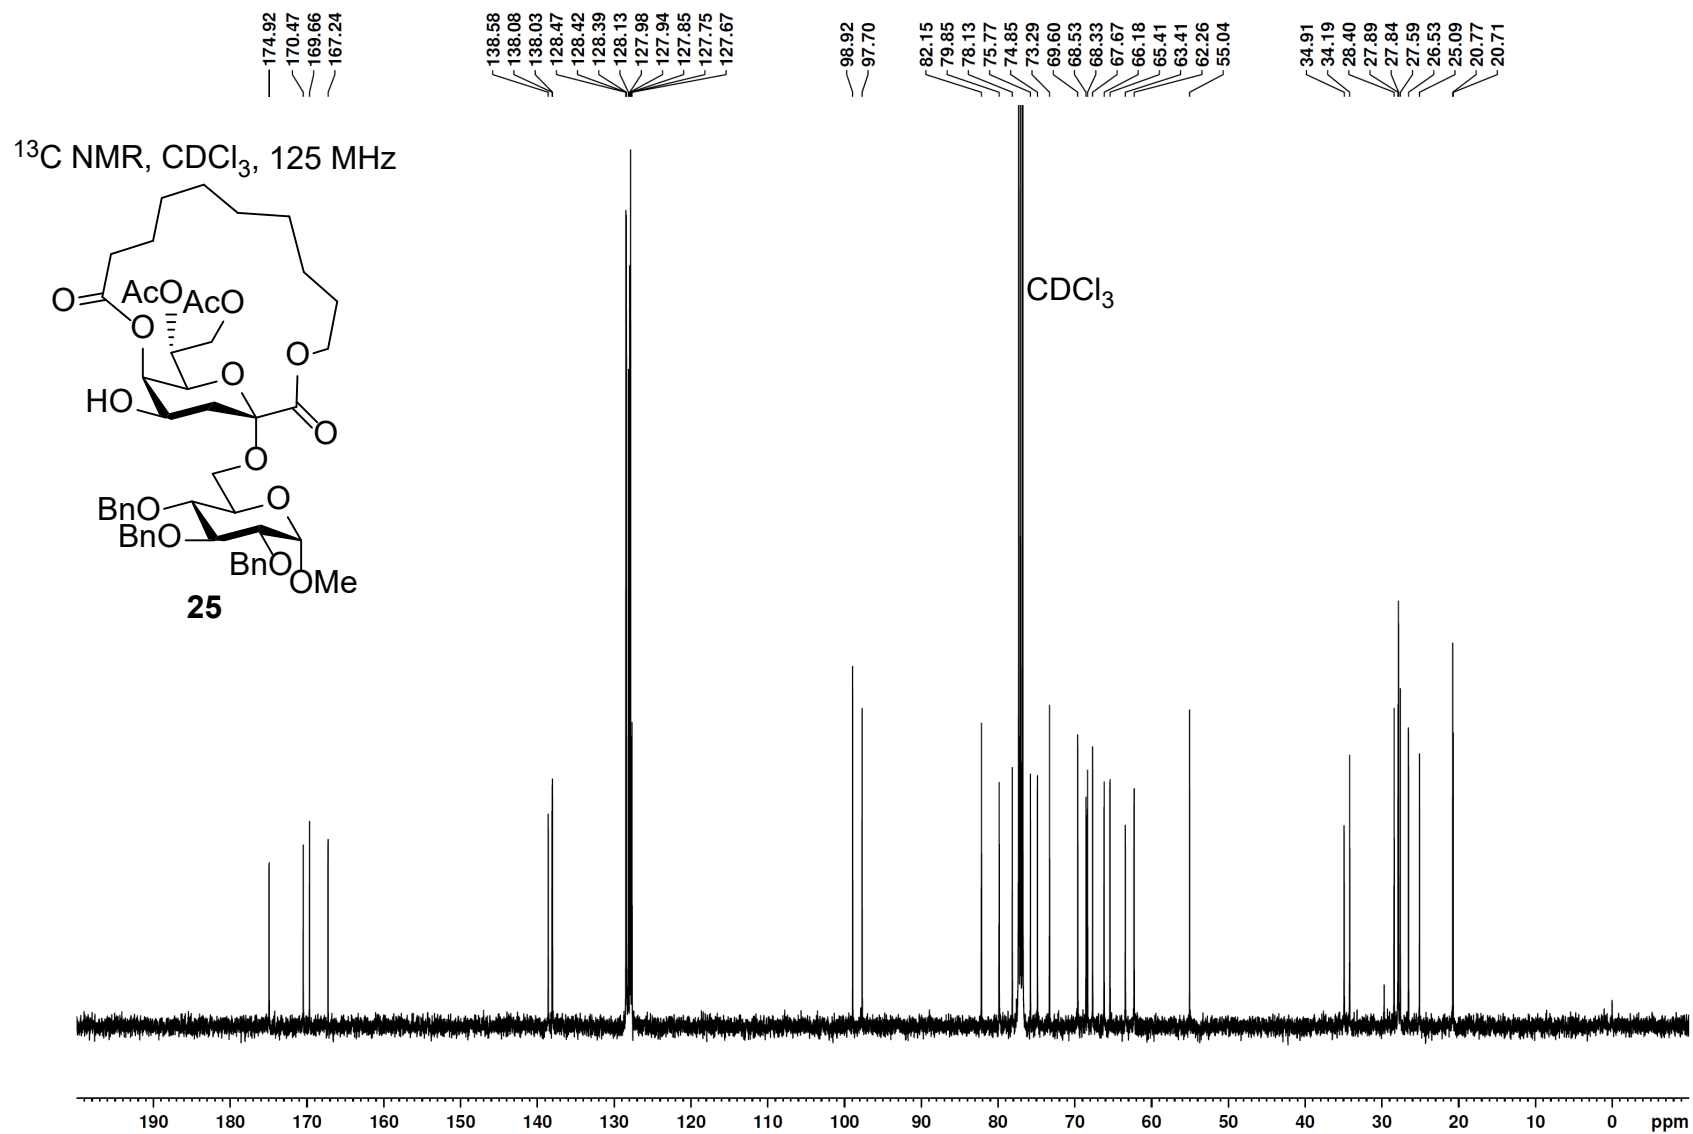

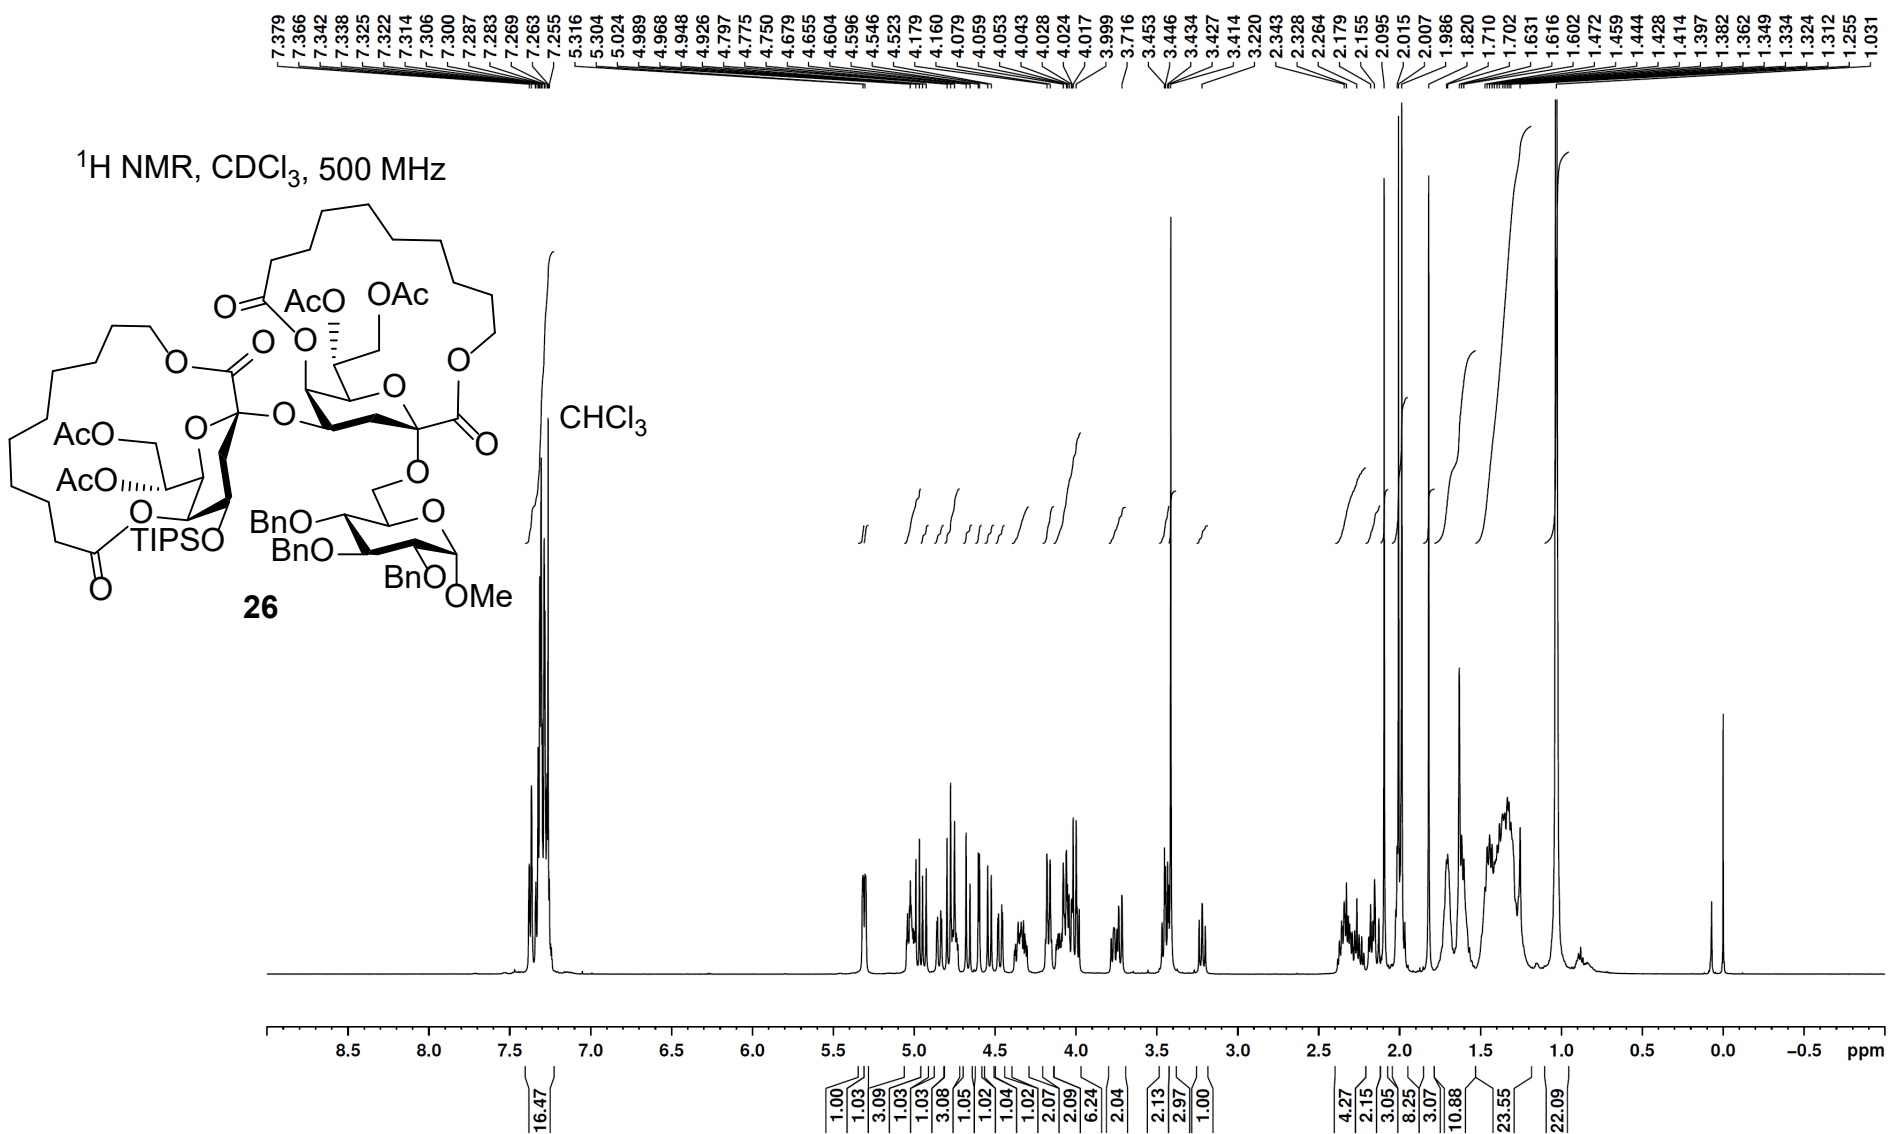



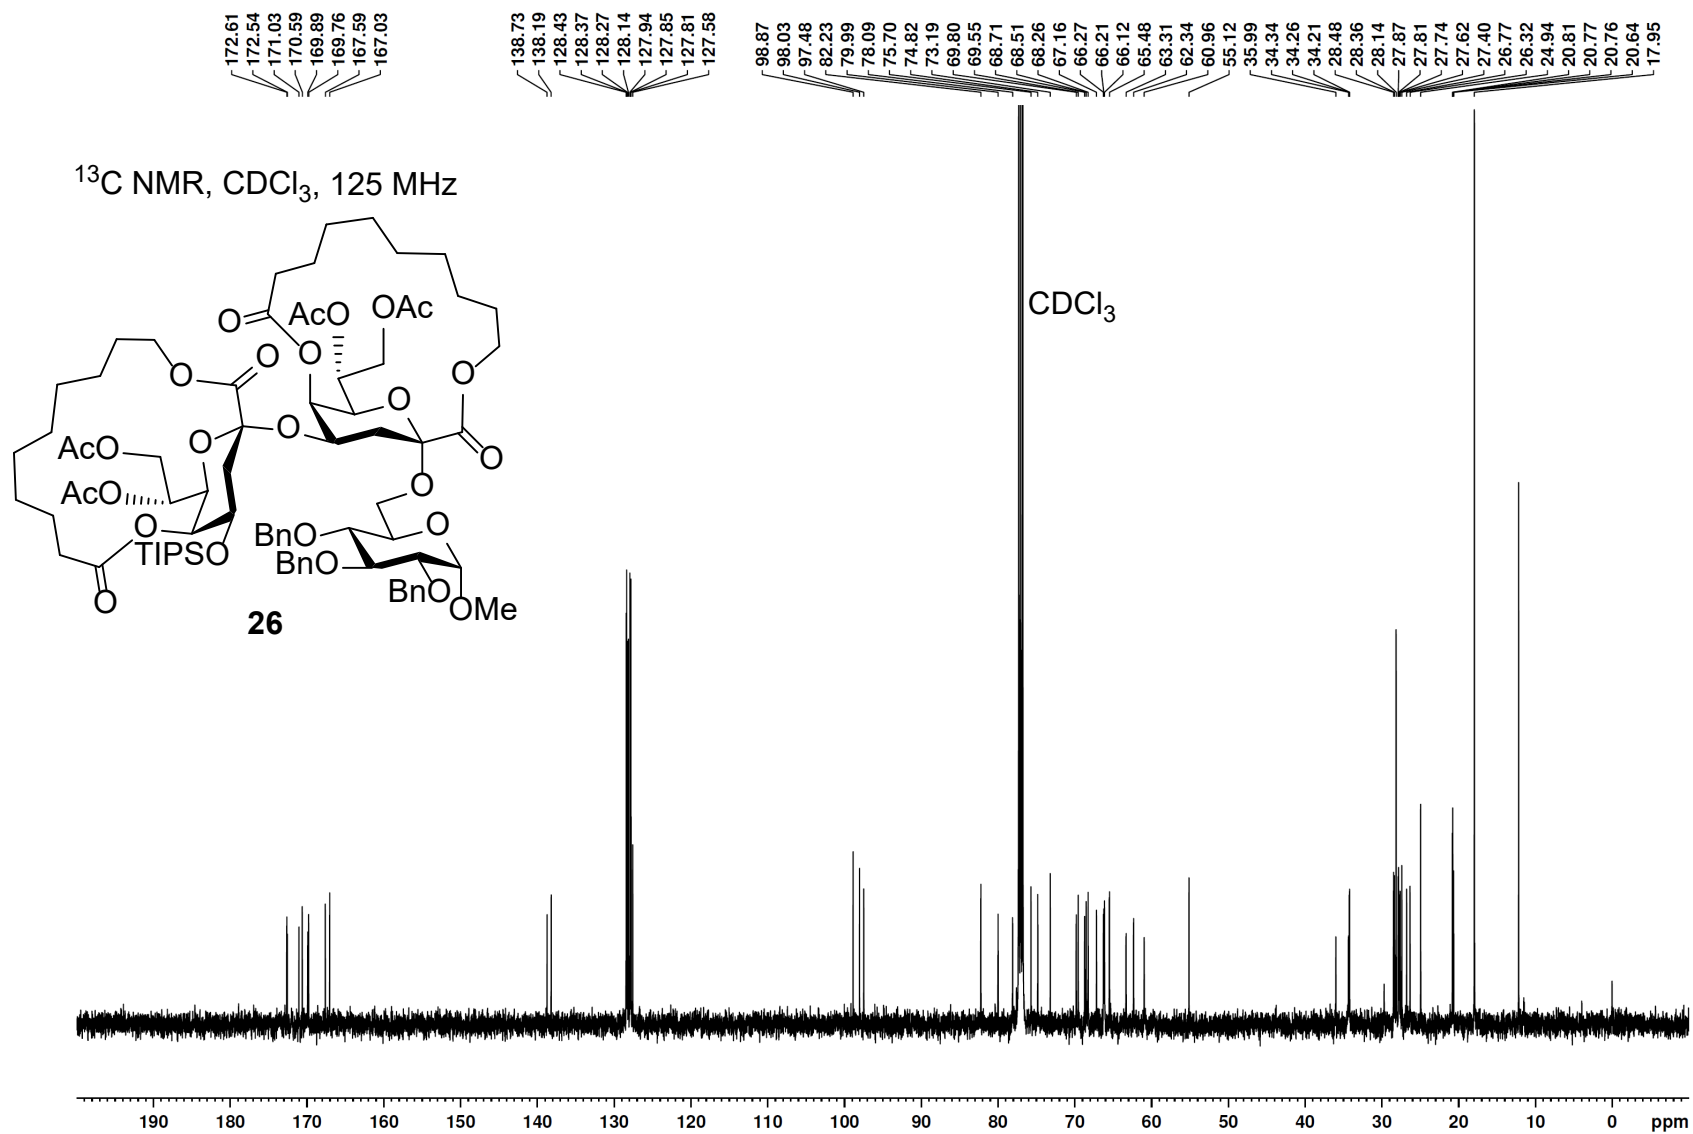

Supplement: s1 [file s1]
